1     **Projected changes of alpine grassland carbon dynamics in response to climate change and**  
2     **elevated CO<sub>2</sub> concentrations under Representative Concentration Pathways (RCP) scenarios**

3

4     Pengfei Han<sup>1¶\*</sup>, Xiaohui Lin<sup>2¶</sup>, Wen Zhang<sup>2\*</sup>, Guocheng Wang<sup>2</sup>

5

6     <sup>1</sup>State Key Laboratory of Numerical Modeling for Atmospheric Sciences and Geophysical Fluid  
7     Dynamics, Institute of Atmospheric Physics, Chinese Academy of Sciences, Beijing 100029,

8     China

9     <sup>2</sup>State Key Laboratory of Atmospheric Boundary Layer Physics and Atmospheric Chemistry,  
10    Institute of Atmospheric Physics, Chinese Academy of Sciences, Beijing 100029, China

11

12

13    \***Correspondence:** pfhan@mail.iap.ac.cn; zhw@mail.iap.ac.cn

14    <sup>¶</sup>These authors contributed equally to this work.

15    Tel.: +86-10-8299-5368

16 **Abstract**

17 The Tibetan Plateau is an important component of the global carbon cycle due to the large  
18 permafrost carbon pool and its vulnerability to climate warming. The Tibetan Plateau has  
19 experienced a noticeable warming over the past few decades and is projected to continue warming  
20 in the future. However, the direction and magnitude of carbon fluxes responses to climate change  
21 and elevated CO<sub>2</sub> concentration under Representative Concentration Pathways (RCP) scenarios in  
22 the Tibetan Plateau grassland are poorly known. Here, we used a calibrated and validated  
23 biogeochemistry model, CENTURY, to quantify the contributions of climate change and elevated  
24 CO<sub>2</sub> on the future carbon budget in the alpine grassland under three RCP scenarios. Though the  
25 Tibetan Plateau grassland was projected a net carbon sink of 16 ~ 25 Tg C yr<sup>-1</sup> in the 21st century,  
26 the capacity of carbon sequestration was predicted to decrease gradually because climate-driven  
27 increases in heterotrophic respiration (Rh) (with linear slopes 0.49 ~ 1.62 g C m<sup>-2</sup> yr<sup>-1</sup>) was greater  
28 than the net primary production (NPP) (0.35 ~ 1.52 g C m<sup>-2</sup> yr<sup>-1</sup>). However, the elevated CO<sub>2</sub>  
29 contributed more to plant growth (1.9% ~ 7.3%) than decomposition (1.7% ~ 6.1%), which could  
30 offset the warming-induced carbon loss. The interannual and decadal-scale dynamics of the  
31 carbon fluxes in the alpine grassland were primarily controlled by temperature, while the role of  
32 precipitation became increasingly important in modulating carbon cycle. The strengthened  
33 correlation between precipitation and carbon budget suggested that further research should  
34 consider the performance of precipitation in evaluating carbon dynamics in a warmer climate  
35 scenario.

36 **Keywords:** carbon dynamics; climate change scenarios; CO<sub>2</sub> fertilization; alpine grassland

## 37 1. Introduction

38 The distinctive geographic environment of the world highest plateau—Tibetan Plateau (with an  
39 average elevation of over 4000 m above sea level) makes its carbon cycle be strongly sensitive to  
40 climate variation and environmental change [1-3]. The Plateau covers a vast area of alpine  
41 vegetation and has a large reservoir of organic carbon in the permafrost soil, and it has been  
42 reported as a significant terrestrial carbon sink for recent decades due largely to warming and CO<sub>2</sub>  
43 fertilization [3-5]. The Plateau has undergone significant warming during the last decades.  
44 Increasing temperatures have been reported to prolong growing season lengths [6], metabolic  
45 rates, and in the productivity and distribution [7] of vegetation at the Plateau and high latitude  
46 areas [8-10]. Furthermore, the fate of soil organic carbon (SOC) is controlled by the complex  
47 processes involving accumulation of carbon input by plant production and loss through microbial  
48 decomposition. Warming may also suppress plant growth by increasing evapotranspiration [11]  
49 and induce the soil carbon loss through enhanced Rh [12]. Thus the carbon fluxes can be  
50 amplified by increased carbon emissions from thawing permafrost [13,14]. Schaphoff et al. [15]  
51 revealed that warming contributed to the net uptake of carbon in the permafrost zone in previous  
52 decades because carbon uptake by vegetation increased at a faster rate than that released from soil.  
53 Furthermore, increasing the atmospheric CO<sub>2</sub> concentrations tends to stimulate photosynthesis and  
54 reduce water loss [16,17], which is likely to offset the adverse effects of climate change.

55 The temperature on the Tibetan Plateau increased with a linear trend of 0.2 °C/decade during  
56 the past five decades [18,19] and is projected to continue warming in the future under different  
57 representative concentration pathways (RCPs) [20,21]. Although there has been several studies on

58 the carbon cycle and climate change associated with the elevated CO<sub>2</sub> on the Tibetan Plateau for  
59 historical research and sensitivity analysis [2,3,20,22,23], there is still a lack of studies on the  
60 carbon dynamic projections under different RCPs on the Plateau. Temperature has been reported  
61 as the critical determinant of carbon exchange in alpine ecosystems [24,25]. The warming had  
62 prolonged the alpine plant phenology [26-28] and promoted the vegetation productivity [3,29],  
63 and consequently enhanced carbon inputs into the soil, offsetting the carbon release from thawing  
64 permafrost in the Tibetan Plateau [4]. The vegetation production on Tibetan Plateau was projected  
65 to increase under future climate scenarios [7,30]. The results of field experiments, however, have  
66 shown some opposite responses of vegetation productivity to warming, which varied by regions  
67 [31-33]. Ganjurjav et al. [34] found that the aboveground net primary production (NPP) was  
68 significantly stimulated in an alpine meadow under experimental warming, whereas it decreased  
69 in an alpine steppe due to warming-induced drought. Furthermore, there are situations that the  
70 climatic warming stimulated the ecosystem respiration more than NPP, which potentially led to  
71 loss of soil carbon in the Tibetan Plateau [18,22,30]. This discrepant responses of NPP and  
72 heterotrophic respiration (Rh) to the climatic warming in the Tibetan Plateau might be quite  
73 different from that in the northern high-latitude permafrost zones [15], where warming increased  
74 NPP more than Rh. In previous historical period modeling studies [3,5,35], a net carbon sink has  
75 been estimated for the Tibetan Plateau grassland for the 20th century, albeit with variability in  
76 absolute value of 11.8 ~ 29.8 Tg C yr<sup>-1</sup>. Based on a field experiment in the Tibetan Plateau alpine  
77 meadow, Zhu et al. [36] found that warming caused a seasonal shift in ecosystem carbon exchange  
78 but had little impact on net carbon uptake. However, the direction and magnitude of carbon fluxes  
79 responses to climate change and elevated CO<sub>2</sub> concentration under future climate scenarios in the

80 Tibetan Plateau grassland remains uncertain. Thus, quantifying the influence of the future climatic  
81 change on the carbon exchange in alpine ecosystems in the Tibetan Plateau will promote our  
82 understanding of the mechanisms in the climate-carbon cycle feedbacks.

83 In this study, we used an onsite calibrated and validated process-based model, CENTURY, to  
84 explore the responses of three important carbon cycle indicators, namely NPP, Rh and net  
85 ecosystem production (NEP), to future climate change projections on alpine grasslands of the  
86 Tibetan Plateau. The representative concentration pathways (RCP) scenarios of the climate change  
87 projections under the framework of the Coupled Model Intercomparison Project Phase 5 (CMIP5)  
88 vary in their total radiative forcing increase by 2100 [37,38]. Three different RCP scenarios (i.e.,  
89 RCP2.6, RCP4.5, and RCP8.5) were applied in this study. The objectives of this paper are: (1) to  
90 predict the trends and differences in the ecosystem carbon cycle components in alpine grasslands  
91 under RCP scenarios during the 21st century; and (2) to differentiate the contributions of the  
92 changing climate variables (temperature and precipitation) and elevated CO<sub>2</sub> on the future carbon  
93 budget on the Tibetan Plateau grasslands.

## 94 **2. Materials and methods**

95 The CENTURY model was originally developed for the U.S. Great Plains grassland ecosystem  
96 [39] and has been successfully adapted to simulate carbon fluxes under climate change across a  
97 wide latitudinal gradient, from tropical to temperate to high-latitude ecosystems [40-44]. A  
98 detailed description of the CENTURY model has been presented by [39,41]. The observed data  
99 for parameterization of the CENTURY model included the nutrient contents in vegetation and soil  
100 that were derived from the Haibei research station of the Chinese Ecosystem Research Network

101 (CERN), Chinese Academy of Sciences. The performance of the CENTURY model on the  
102 Tibetan Plateau grassland has been evaluated by the observed net ecosystem exchange (NEE),  
103 ecosystem respiration ( $R_e$ ), gross primary production (GPP) (2003 ~ 2005) obtained from the  
104 Haibei flux tower observations and aboveground biomass (AGC) (2000 ~ 2012) obtained from the  
105 field sampling at Haibei research station [23]. In addition, the  $R_e$  was further separated into  
106 autotrophic respiration ( $R_a$ ) and heterotrophic respiration ( $R_h$ ) according to the study of [45], and  
107 the net primary production (NPP) was then obtained by subtracting  $R_a$  from GPP. The site-level  
108 verification from our previous study showed that the parameterized CENTURY model was able to  
109 capture the carbon fluxes of alpine grassland ( $R^2 > 0.80$ , Fig 1). The simulated monthly AGC  
110 exhibited a good agreement with the observed data with the slope close to 1, and the intercept and  
111 the root mean square error (RMSE) were less than  $25 \text{ g C m}^{-2}$ . Compared to the eddy-covariance  
112 flux data, the simulated monthly NPP and  $R_h$  were comparable to the observation with slopes  
113 equal to 0.77 and 1.10, and the estimated errors of RMSE were  $29.06 \text{ g C m}^{-2}$  and  $13.24 \text{ g C m}^{-2}$ ,  
114 respectively. The simulated NEE was also agreed well with the field observation ( $R^2 = 0.88$ ,  
115  $\text{RMSE} = 17.94$ ), while the seasonal amplitude of the simulated NEE was slightly higher than that  
116 from the flux tower data with a slope of 0.64) [23]. We acknowledged that the model  
117 parameterization was dependent on data from Haibei station, which could cause a certain degree  
118 of uncertainty. This was due largely to the fact that most of the existed observations on the Plateau  
119 were not long-term experiments and lacked necessary information for model calibration. At the  
120 regional scale, our previous historical simulated results were comparable to other studies, with a  
121 mean NPP and NEP of  $259 \text{ g C m}^{-2} \text{ yr}^{-1}$  and  $10 \text{ g C m}^{-2} \text{ yr}^{-1}$  from 1981 to 2010, respectively [23],  
122 which was within the range of  $120 \sim 340 \text{ g C m}^{-2} \text{ yr}^{-1}$  and  $8 \sim 24 \text{ g C m}^{-2} \text{ yr}^{-1}$  reported by [3,5,46].

123 The spin up procedure for the CENTURY model simulation followed the published literature  
124 [47,48].

125

126 Fig 1. Comparisons of observed and modeled aboveground biomass (AGC, a), and net primary  
127 production (NPP, b), heterotrophic respiration (Rh, c), and net ecosystem production (NEE, d) at  
128 the Haibei research station of the Tibetan Plateau.

129

130 The simulation began with an equilibrium run to generate an initial condition using long-term  
131 average climate data for the period from 1901~1930, which was then followed by a spin up (1980  
132 ~ 2005) to eliminate system fluctuations and to steady the transient simulation. The climate input  
133 data for the history period of 1901 ~ 2005 was obtained from the Climatic Research Unit (CRU)  
134 Time-Series (TS) version 3.23 (TS 3.23), School of Environmental Sciences, University of East  
135 Anglia, United Kingdom [49,50]. The CENTURY model was then forced with outputs from the  
136 Coordinated Regional Downscaling Experiment (CORDEX), including monthly maximum and  
137 minimum temperature and precipitation under three RCPs scenarios (RCP2.6, RCP4.5 and  
138 RCP8.5). The CORDEX data used in this study were dynamical downscaled at a high spatial  
139 resolution of 0.5° with two regional climate models (RCMs) of RCA4 and REMO2009 driven by  
140 ICHEC-EC-EARTH and MPI-M-MPI-ESM-LR global models based on the Coupled Model  
141 Intercomparison Project Phase 5 (CMIP5) simulations [51]. The calibrated parameters for the  
142 regional simulation were obtained from our previous studies on the Tibetan Plateau grasslands  
143 [23].

## 144 3. Results

### 145 3.1 Temporal dynamics of the carbon budget on the Tibetan Plateau grasslands

146 Interannual variations in the grassland carbon budget on the Tibetan Plateau in response to  
147 changes in climate and atmospheric CO<sub>2</sub> over the 21st century were simulated. The CENTURY  
148 model predicted that the grass NPP would range from  $308 \pm 13 \text{ g C m}^{-2} \text{ yr}^{-1}$  to  $495 \pm 21 \text{ g C m}^{-2}$   
149  $\text{yr}^{-1}$ , with a multiyear mean NPP of  $357 \pm 18 \text{ g C m}^{-2} \text{ yr}^{-1}$  for RCP2.6,  $375 \pm 20 \text{ g C m}^{-2} \text{ yr}^{-1}$  for  
150 RCP4.5, and  $408 \pm 26 \text{ g C m}^{-2} \text{ yr}^{-1}$  for RCP8.5 on the Tibetan Plateau, respectively (Fig 2a). The  
151 interannual variation in the grass NPP was projected to increase to different degrees under the  
152 three RCP scenarios over the period 2006 ~ 2100, with linear slopes of  $0.35 \text{ g C m}^{-2} \text{ yr}^{-1}$  ( $P < 0.01$ ),  
153  $0.85 \text{ g C m}^{-2} \text{ yr}^{-1}$  ( $P < 0.01$ ), and  $1.52 \text{ g C m}^{-2} \text{ yr}^{-1}$  ( $P < 0.01$ ) for RCP2.6, RCP4.5, and RCP8.5,  
154 respectively. The temporal dynamics of Rh were consistent with the NPP trends in all scenarios,  
155 with mean absolute values of  $346 \pm 9 \text{ g C m}^{-2} \text{ yr}^{-1}$ ,  $360 \pm 12 \text{ g C m}^{-2} \text{ yr}^{-1}$ , and  $390 \pm 19 \text{ g C m}^{-2}$   
156  $\text{yr}^{-1}$ , whereas the magnitude of the variation rates of Rh were all greater than that of NPP, with  
157 slopes of  $0.49 \text{ g C m}^{-2} \text{ yr}^{-1}$  ( $P < 0.01$ ),  $0.91 \text{ g C m}^{-2} \text{ yr}^{-1}$  ( $P < 0.01$ ), and  $1.62 \text{ g C m}^{-2} \text{ yr}^{-1}$  ( $P < 0.01$ ) for  
158 RCP2.6, RCP4.5, and RCP8.5, respectively (Fig 2b). These higher rates of Rh increase in all the  
159 three scenarios may suggest that Rh was more sensitive to climate change than NPP. On average,  
160 the alpine grasslands of the Tibetan Plateau behaved as a carbon sink, with a simulated NEP on a  
161 range of  $11 \pm 16 \text{ g C m}^{-2} \text{ yr}^{-1}$ ,  $15 \pm 16 \text{ g C m}^{-2} \text{ yr}^{-1}$ , and  $18 \pm 16 \text{ g C m}^{-2} \text{ yr}^{-1}$  for RCP2.6, RCP4.5,  
162 and RCP8.5, respectively, for the period from 2006~2100 (Fig 2c). However, the temporal  
163 dynamics of the NEP indicated relatively less variability than NPP and Rh under the three RCP  
164 scenarios, and decreased continually with the slopes of  $-0.14 \text{ g C m}^{-2} \text{ yr}^{-1}$  ( $P < 0.01$ ),  $-0.07 \text{ g C m}^{-2}$



165  $\text{yr}^{-1}$  ( $P=0.13$ ), and  $-0.10 \text{ g C m}^{-2} \text{ yr}^{-1}$  ( $P<0.05$ ) for RCP2.6, RCP4.5, and RCP8.5, respectively.

166 This indicated that the potential capacity for carbon sequestration on the Tibetan Plateau  
167 grasslands would gradually decrease under future climate change, because the magnitude of the  
168 variation rate of Rh was greater than that of NPP.

169

170 Fig 2. Temporal dynamics of simulated NPP (a), Rh (b), and NEP (c) in the Tibetan Plateau  
171 grassland from 2006 to 2100. Solid lines are the three climate models means under different RCP  
172 scenarios, and the shading area denotes one standard deviation.

### 173 **3.2 The response of the interannual carbon budget to future climate variability**

174 The simulated carbon fluxes exhibited a positive correlation with precipitation across the three  
175 RCP scenarios with the partial correlation coefficients (R) in the range of 0.07 ~ 0.48 (Fig 3). The  
176 positive response of the carbon fluxes to annual precipitation variation became stronger with  
177 increasing temperature. Higher correlations between carbon fluxes (NPP and Rh) and precipitation  
178 were found in RCP8.5 with R values of 0.33 ( $P < 0.05$ , Fig 3c) and 0.48 ( $P < 0.05$ , Fig 3f) than  
179 those in RCP2.6 ( $R = 0.25$  and  $0.34$ ,  $P < 0.05$ , Fig 3a,d), respectively. Spatially, the carbon fluxes  
180 showed a strong positive relationship with precipitation in the midwestern and northeastern part of  
181 the Tibetan Plateau grassland ( $R > 0.3$ ,  $P < 0.05$ , Fig 3). However, an obvious negative correlation  
182 between NEP and precipitation was found in the southern and middle part of the Plateau (Fig  
183 3g-i). This was probably due to the fact that precipitation gradually decreased from the southeast  
184 to the northwest [20]. Increased precipitation in the southeastern mountainous area could lead to  
185 more cloud cover, and thus have negative effects on photosynthesis. The Rh tended to be most

186 sensitive to the precipitation variation ( $R:0.34 \sim 0.48$ ,  $P < 0.05$ , Fig 3d-f) , followed by NPP  
187 ( $R:0.25 \sim 0.33$ ,  $P < 0.05$ , Fig 3a-c) and NEP ( $R:0.07 \sim 0.08$ ,  $P > 0.05$ , Fig 3g-i).

188

189 Fig 3. Spatial distributions of the partial correlation coefficients (R) between precipitation and  
190 simulated NPP (a, b, c), Rh (d, e, f), and NEP (g, h, i) in the Tibetan Plateau grassland from 2006  
191 to 2100 under the three RCP scenarios. Black point signs showed significance level at  $P < 0.05$ .

192

193 As illustrated in Fig 4, the simulated carbon fluxes exhibited a positive correlation with  
194 temperature (Tmean) ( $R: 0.03 \sim 0.76$ ), while the R between NEP and Tmean equal to  $-0.09$ . The  
195 positive responses of the NPP and Rh to Tmean were stronger in RCP8.5 with R values of 0.54 ( $P$   
196  $< 0.05$ , Fig 4c) and 0.76 ( $P < 0.05$ , Fig 4f) than those in RCP2.6 ( $R = 0.32$  and  $0.30$ ,  $P < 0.05$ , Fig  
197 4a,d). Spatially, the strong positive responses of simulated NPP and Rh to Tmean change were  
198 found across the majority of the Plateau ( $R > 0.4$ ,  $P < 0.05$ , Fig 4a-f), while the NPP and NEP  
199 showed an obvious negative responses to increasing temperature in the midwestern and  
200 northeastern part of the Plateau ( $R < -0.2$ ,  $P < 0.05$ , Fig 4a-c,g-i). This was probably related to the  
201 the fact that limited rainfall in these areas could not meet the increase in water demand under  
202 warming. The magnitude of Rh increase in response to Tmean ( $R:0.30 \sim 0.76$ ,  $P < 0.05$ , Fig 4d-f)  
203 was larger than that of NPP ( $R:0.33 \sim 0.55$ ,  $P < 0.05$ , Fig 4a-c) and NEP ( $R:-0.09 \sim 0.14$ ,  $P >$   
204  $0.05$ , Fig 4g-i), indicating that warming stimulates respiration more than plant growth and  
205 subsequently decreases carbon sink.

206

207 Fig 4. Spatial distributions of the partial correlation coefficients (R) between Tmean and simulated

208 NPP (a, b, c), Rh (d, e, f), and NEP (g, h, i) in the Tibetan Plateau grassland from 2006 to 2100  
209 under the three RCP scenarios. Black point signs showed significance level at  $P < 0.05$ .

### 210 **3.3 The response of the decadal carbon budget to future climate change**

211 To quantify the carbon cycle of the Tibetan Plateau grasslands in response to the climate  
212 variability, we further evaluate the decadal-scale dynamics of climate and carbon budgets during  
213 three time periods (Fig 5). The 2010s ~ 2030s time period was calculated as the difference  
214 between the decadal averages of the years 2010 ~ 2019 and 2030 ~ 2039, and the same was done  
215 for the 2040s ~ 2060s and 2070s ~ 2090s time periods. The decadal change of carbon fluxes (e.g.  
216  $\Delta$ NPP and  $\Delta$ Rh) were positively linearly correlated with the  $\Delta$ Tmax (Fig 5d,e) and  $\Delta$ Tmin (Fig  
217 5g,h), with  $R^2$  in a range of 0.59 ~ 0.67 ( $P < 0.01$ ). It was suggested that the increase in  
218 temperature could stimulate both vegetation production and also Rh. Furthermore, the linear  
219 slopes indicated that 1% increase in Tmax and Tmin caused a larger increase of Rh by 0.27%  
220 (Fig 5c) and 0.24% (Fig 5h) than those of NPP by 0.23% (Fig 5d) and 0.21% (Fig 5g). This  
221 suggested that Rh was more sensitive than NPP to increasing temperature. Consequently, the  
222 simulated NEP exhibited a decreasing trend under a warming climate. With respect to the  
223 response to the decadal change of precipitation, the dynamics of the  $\Delta$ NPP and  $\Delta$ Rh showed an  
224 increasing trend with  $\Delta$ Precipitation, while these positive responses tended to be stagnant (Fig  
225 5a,b). As the decadal change of precipitation varied within comparatively small ranges (~ 5%),  
226 temperature might play an important role in modulating the carbon fluxes of alpine  
227 grassland. Taken together, the changes in  $\Delta$ NEP suggested that the alpine grassland still behaved  
228 as a carbon sink but its capacity declined over the 21st century.

229

230 Fig 5. Responses of simulated  $\Delta$ NPP (a, d, g),  $\Delta$ Rh (b, e, h), and  $\Delta$ NEP (c, f, i) in the Tibetan  
231 Plateau grassland to climate change over the 2010s ~ 2030s, 2040s ~ 2060s and 2070s ~ 2090s  
232 time periods under the three RCP scenarios.

233

234 Under RCP2.6, the  $\Delta$ Precipitation was 3%, 0%, and -1% (Fig 5a-c), with the  $\Delta$ Tmax being  
235 13%, -5%, and -8% (Fig 5d-f), and the  $\Delta$ Tmin 8%, -4%, and -7% (Fig 5g-i) for 2010s ~ 2030s,  
236 2040s ~ 2060s and 2070s ~ 2090s time periods, respectively. This decadal climate change led to a  
237 corresponding decrease in  $\Delta$ NPP from 4% to 1% and 0% for the three time periods (Fig 5a, d, g),  
238 and the same decrease in  $\Delta$ Rh (Fig 5b, e and h), and consequently led to a decrease in  $\Delta$ NEP from  
239 25% to 16% and 6% (Fig 5c, f and i). In response to the continual decrease in temperature and  
240 precipitation, the changes in the decadal carbon dynamics were predicted to show a corresponding  
241 downward trend in the RCP2.6 scenario. For RCP4.5, the  $\Delta$ Precipitation was -1%, 1%, and 0%,  
242 with the  $\Delta$ Tmax 12%, 6%, and 4%, and the  $\Delta$ Tmin 6%, 6%, and 4% in the 2010s ~ 2030s, 2040s ~  
243 2060s and 2070s ~ 2090s time periods, respectively. In this scenario, the reduction in the  
244 magnitude of the warming trend was accompanied by stable precipitation, which led to a  
245 corresponding decrease in  $\Delta$ NPP of 5%, 3%, and 4%, and in  $\Delta$ Rh of 7%, 5%, and 4%,  
246 respectively. The discrepant magnitudes of the increase in NPP and Rh across different periods,  
247 resulting in the variations of the  $\Delta$ NEP were -13%, -30%, and 8%, respectively. The decrease in  
248  $\Delta$ NEP in the first two periods was mainly due to a larger increase in Rh than NPP. Under RCP8.5,  
249 both the precipitation and temperature were projected to increase when the  $\Delta$ Precipitation was 5%,  
250 1%, and 7%, and the  $\Delta$ Tmax was 10%, 22%, and 14%, and the  $\Delta$ Tmin was 7%, 20%, and 25% for

251 2010s ~ 2030s, 2040s ~ 2060s and 2070s ~ 2090s time periods, respectively. The projected large  
252 warming trend over the Tibetan Plateau would favor the growth of alpine grass, with a  $\Delta$ NPP of  
253 8%, 6%, and 8%, and could also exacerbate carbon decomposition with a  $\Delta$ Rh of 9%, 7%, and  
254 8%, respectively. Consequently, the NEP correspondingly decreased by -3%, -21%, and -3%,  
255 respectively. The substantial decrease in the  $\Delta$ NEP over the 2040s ~ 2060s time period was also  
256 partially due to the water stress under strong warming conditions. The dynamics of NEP were  
257 largely dependent on the different responses of NPP and Rh to climate change.

258

#### 259 **3.4 The response of the carbon budget to future elevated CO<sub>2</sub> concentrations**

260 To quantify the effect of increased CO<sub>2</sub> on the carbon fluxes on alpine grasslands, we conducted  
261 two model simulations: with and without CO<sub>2</sub> fertilization. Then, the difference between the two  
262 simulated results was analyzed to evaluate the impacts of CO<sub>2</sub> on the carbon budget under the  
263 three RCP scenarios (Fig 6). Across all scenarios, the increasing CO<sub>2</sub> concentration accounted for  
264 1.9%, 3.6%, and 7.3% of the increase in NPP (Fig 6a), and 1.7%, 3.0%, and 6.1% of the increase  
265 in Rh (Fig 6b) under RCP2.6, RCP4.5, and RCP8.5, respectively. Furthermore, the linear slopes  
266 indicated that 1 ppm increase in CO<sub>2</sub> concentration caused a slightly larger increase of NPP by  
267 0.06 ~ 0.45 g C m<sup>-2</sup> yr<sup>-1</sup> (Fig 6a) than those of Rh by 0.06 ~ 0.43 g C m<sup>-2</sup> yr<sup>-1</sup> (Fig 6b). Notably,  
268 the CO<sub>2</sub> fertilization effect would be substantially amplified when accompanied by an increase in  
269 temperature (slope<sub>T<sub>max</sub></sub> = 0.6 °C decade<sup>-1</sup> and slope<sub>T<sub>min</sub></sub> = 0.7 °C decade<sup>-1</sup>, Fig 5d, g) and  
270 precipitation (slope = 10.0 mm decade<sup>-1</sup>, Fig 5a) under RCP8.5. By the end of the 21st century  
271 (2090s), the  $\Delta$ NPP and  $\Delta$ Rh both largely increased from RCP2.6 to RCP8.5, ranging from 2.4% to

272 11.0%. However, the magnitude of the difference in NEP was relatively small, with multi-model  
273 mean values of 0.9, 2.3, and 4.9 g C m<sup>-2</sup> yr<sup>-1</sup> for RCP2.6, RCP4.5, and RCP8.5, respectively (Fig  
274 6c). The elevated CO<sub>2</sub> contributed more to plant growth than decomposition, indicating that the  
275 Tibetan Plateau grassland was able to sequester carbon from the atmosphere due to CO<sub>2</sub>  
276 fertilization.

277

278 Fig 6. The differences between simulated NPP (a), Rh (b), and NEP (c) with and without CO<sub>2</sub>  
279 effects in the Tibetan Plateau grassland under the three RCP scenarios.

#### 280 4. Discussion

281 . The carbon fluxes of the alpine grassland in the Tibetan Plateau were stimulated to be strongly  
282 influenced by the climate change and elevated CO<sub>2</sub> concentrations [3,5]. Over the 21st century, the  
283 Tibetan Plateau grassland NPP and Rh were projected to significantly increase, at rates of 0.35 ~  
284 1.52 g C m<sup>-2</sup> yr<sup>-1</sup> and 0.49 ~ 1.62 g C m<sup>-2</sup> yr<sup>-1</sup>, respectively, under the three scenarios. These  
285 increases in NPP and Rh were primarily due to the effects of warming and elevated CO<sub>2</sub>  
286 concentrations, while the positive impact of precipitation became stable (Fig 5,6). The enhanced  
287 vegetation production in future projections was consistent with the model estimations of Gao et al.  
288 [7] and Jin et al. [30]. The dynamics of decadal carbon fluxes ( $\Delta$ NPP and  $\Delta$ Rh) were predicted  
289 to decrease with precipitation and temperature under RCP2.6, and with temperature in a relatively  
290 stable precipitation scenario under RCP4.5 (Fig 5). Across all scenarios, the partial correlation (R)  
291 between the carbon fluxes (NPP and Rh) and Tmean (Fig 4a-f) were higher than those with  
292 precipitation (Fig 3a-f), except for the Rh in RCP4.5. These results suggested that the carbon cycle

293 in the alpine region may be primarily controlled by the temperature increase. However, the partial  
294 correlation between carbon sink (NEP) and Tmean was predicted to decrease from 0.14 in RCP2.6  
295 to -0.09 in RCP8.5 under a warmer scenario (Fig 4g,i). The partial correlation of NEP with  
296 precipitation were equal to 0.07 and 0.08 in RCP4.5 and RCP8.5 (Fig 3h,i), which were higher  
297 than with Tmean (0.04 and -0.09, Fig 4h,i). Furthermore, the decadal carbon fluxes were predicted  
298 to decrease with decreasing precipitation, albeit increasing temperature under RCP8.5 during the  
299 2040s ~ 2060s (Fig 5). The role of precipitation was becoming increasingly important in carbon  
300 uptake of the Tibetan Plateau grassland. The seasonal dynamics of carbon exchange in alpine  
301 grassland under warming were likely to be modulated by water availability [36]. Similar results  
302 were found in Inner Mongolia [52], the central and eastern United States [53], and California [54],  
303 which indicated that grass production would largely decrease under warmer and drier climate  
304 scenarios. The warming accelerated the evapotranspiration and then changed the soil water  
305 availability [55,56]. When the soil water availability became limited, the vegetation production  
306 might decrease due to suppressed photosynthesis [57] and also reduce root biomass [58]. Shen et  
307 al. [6] and Shen et al. [59] further indicated that the precipitation may regulate the response of  
308 vegetation phenology and soil respiration to climatic warming on the Tibetan Plateau. The water  
309 availability became an increasingly important factor on carbon dynamics on the Tibetan Plateau  
310 grasslands, particularly under a warmer climate scenario. These results highlight the significance  
311 of accurate projection of precipitation (i.e. the amounts and distributions) under three RCP  
312 scenarios, which should be considered in estimates of the carbon fluxes.

313 The Tibetan Plateau grasslands were projected to be a net carbon sink (16 ~ 25 Tg C yr<sup>-1</sup>)  
314 over the 21st century, which was comparable to the results of Jin et al. [30] with NEP ranging

315 from 18 to 46 Tg C yr<sup>-1</sup>. However, the temporal dynamics of NEP all exhibited a slightly  
316 decreasing trend, with slopes of -0.07 ~ -0.14 g C m<sup>-2</sup> yr<sup>-1</sup> across the three RCP scenarios. This  
317 was probably due to the fact that warming induced more carbon inputs into the soil and  
318 accelerated respiration rates (Rh), leading to reduced carbon uptake [60,61]. On the other side,  
319 Cao and Woodward [62] found that the increasing trend in carbon uptake would be diminished by  
320 the acclimated response to climate variability and CO<sub>2</sub> fertilization effect. Consequently, the  
321 temporal dynamics of simulated SOC increased 10 ~ 15 Mg C ha<sup>-1</sup> (i.e., 1.4 ~ 2.1 Pg C for 1.4 ×  
322 10<sup>6</sup> km<sup>2</sup>) over the 21st century, while the changing rate showed a decreasing trend of -0.12 ~ -0.06  
323 g C m<sup>-2</sup> yr<sup>-1</sup> (*P*<0.01) under the three RCP scenarios. These results were in line with the  
324 projections from the CMIP5 [63], but inconsistent with the findings of Crowther et al. [64], due  
325 largely to the high initial SOC density in high-latitude areas. Our findings suggested that the  
326 carbon sequestration in the vegetation and soil was projected to increase under three RCP  
327 scenarios, but the carbon sequestration rate was predicted to decrease gradually on the Tibetan  
328 Plateau grasslands.

329 The carbon dynamics exhibited a large discrepancy in response to climate change with and  
330 without the effect of elevated CO<sub>2</sub> concentrations. The carbon uptake by vegetation could be  
331 strongly stimulated by CO<sub>2</sub> fertilization, especially in July [65]. The increasing CO<sub>2</sub> concentration  
332 accounted for 1.9% ~ 7.3% of the increase in NPP (Fig 6a), which was less than the range of 9% ~  
333 11% in the perennial grassland experiment at the Cedar Creek Ecosystem Science Reserve in  
334 central Minnesota during 1998 ~ 2010 [66]. Furthermore, the slope of NPP was predicted to  
335 increase by 18% ~ 29% under CO<sub>2</sub> fertilization among all scenarios, which was slightly less than  
336 the estimates of Piao et al. [3] (~ 39%) on the Tibetan Plateau grasslands during the past five



337 decades. This was probably due to the effect of CO<sub>2</sub> fertilization, which tended to be saturated  
338 over time, and the discrepancy that existed in different models. Furthermore, the response of Rh to  
339 CO<sub>2</sub> was of the same magnitude (1.7% ~ 6.1%) as that in NPP during the 21st century. The  
340 elevated CO<sub>2</sub> concentrations generally had a positive effect on soil respiration by regulating the  
341 carbon uptake and allocation, and on the availability of substrate and soil water [67].  
342 Consequently, the almost consistent increase in NPP and Rh caused by the elevated CO<sub>2</sub> on the  
343 alpine grassland resulted in a relatively small difference in NEP (0.9 ~ 4.9 g C m<sup>-2</sup> yr<sup>-1</sup>, Fig 6c).  
344 However, the grassland carbon cycle was projected to be amplified by around two to three times  
345 due to higher CO<sub>2</sub> concentrations under RCP8.5 compared to that in RCP2.6 and RCP4.5. The  
346 different potential responses to elevated CO<sub>2</sub> levels were partly due to the different climate  
347 conditions among the three RCP scenarios. For RCP2.6, the increasing CO<sub>2</sub> associated with a  
348 decreasing trend in temperature and precipitation had a minor effect on the carbon cycle (Fig 6a).  
349 Furthermore, the elevated CO<sub>2</sub> favored plant growth limitedly in RCP4.5, as the continually  
350 warming and stable precipitation may induce water stress (Fig 6b). However, increasing  
351 temperature and precipitation, together with increasing CO<sub>2</sub>, greatly enhanced the carbon uptake  
352 in the alpine ecosystem under RCP8.5 (Fig 6c).

353 Furthermore, the dynamically downscaled climate data using regional climate models  
354 (RCMs) indicated an improved performance compared to the coarse output from global climate  
355 models (GCMs) [51,68]. Jin et al. [30] indicated that the increased resolution of RCMs was  
356 preferable for capturing the regional climate patterns, especially under the complex surface  
357 characteristics of the Tibetan Plateau. There are also substantial uncertainties in projected climate  
358 change for RCMs, coming from the driving GCMs and human action [69,70]. Moreover, without

359 taking the effect of nitrogen (N) into account, the quantitative attribution of future climate change  
360 and elevated CO<sub>2</sub> concentrations on the carbon dynamics of the Tibetan Plateau grasslands should  
361 be considered merely suggestive. The N is regarded as a limiting factor, controlling the carbon  
362 uptake and further influencing the climate – carbon cycle feedback [71,72]. However, most of the  
363 current carbon cycle models lack N dynamics [71]. Further efforts should be made to incorporate  
364 N feedback to constrain the uncertainty of the carbon cycle in response to a changing environment  
365 [73,74].

## 366 **5. Conclusions**

367 By applying a process-based biogeochemistry model, CENTURY, we quantified the carbon  
368 dynamics on the Tibetan Plateau grasslands in response to climate change and elevated CO<sub>2</sub> under  
369 the RCP scenarios. The Tibetan Plateau grasslands behaved as a net carbon sink with the NEP of  
370 16 ~ 25 Tg C yr<sup>-1</sup> over the 21st century. However, the potential capacity for carbon sequestration  
371 on the Tibetan Plateau grasslands was predicted to decrease gradually with the slopes ranging  
372 from -0.14 to -0.07. The partial correlation between carbon fluxes and climate indicated that  
373 warming stimulated respiration more than plant growth. However, the elevated CO<sub>2</sub> contributed  
374 more to plant growth than decomposition, which could offset the warming-induced carbon loss.  
375 The interannual and decadal-scale dynamics of the carbon fluxes were primarily controlled by  
376 temperature, while the role of precipitation became increasingly important in modulating carbon  
377 budgets in the alpine grassland. The stable precipitation accompanied by noticeable warming in  
378 RCP4.5 (2010s ~ 2030s and 2040s ~ 2060s) and RCP8.5 (2040s ~ 2060s) led to a reduction of  
379 carbon sink ( $\Delta$ NEP) by -13%, -30% and -21%, respectively. These results highlighted the

380 importance of precipitation in regulating the contribution of CO<sub>2</sub> fertilization and warming effect

381 on carbon dynamics in a warmer climate scenario.

382

383 **Acknowledgments**

384 This work was supported by National Key R&D Program of China (No. 2017YFB0504000) and

385 the Postdoctoral Science Foundation of LASG Dean (No. 7-091162) to P.F.H.. We are grateful to

386 the Chinese Ecosystem Research Network (CERN) and the Botanical Division of Chinese

387 Biodiversity Information Center, Institute of Botany for kindly providing the Haibei observation

388 datasets.

389

390 **Conflicts of interest:** The authors declare that they have no conflict of interest.

## 391     **References**

- 392     1. Chen L, Liang J, Qin S, Liu L, Fang K, et al. (2016) Determinants of carbon release from the active  
393         layer and permafrost deposits on the Tibetan Plateau. *Nature Communications* 7.
- 394     2. Yang K, Wu H, Qin J, Lin C, Tang W, et al. (2014) Recent climate changes over the Tibetan Plateau  
395         and their impacts on energy and water cycle: A review. *Global and Planetary Change* 112:  
396         79-91.
- 397     3. Piao S, Tan K, Nan H, Ciais P, Fang J, et al. (2012) Impacts of climate and CO<sub>2</sub> changes on the  
398         vegetation growth and carbon balance of Qinghai-Tibetan grasslands over the past five  
399         decades. *Global and Planetary Change* 98-99: 73-80.
- 400     4. Ding J, Chen L, Ji C, Hugelius G, Li Y, et al. (2017) Decadal soil carbon accumulation across Tibetan  
401         permafrost regions. *Nature Geoscience* 10: 420-424.
- 402     5. Zhuang Q, He J, Lu Y, Ji L, Xiao J, et al. (2010) Carbon dynamics of terrestrial ecosystems on the  
403         Tibetan Plateau during the 20th century: An analysis with a process-based biogeochemical  
404         model. *Global Ecology and Biogeography* 19: 649-662.
- 405     6. Shen M, Zhang G, Cong N, Wang S, Kong W, et al. (2014) Increasing altitudinal gradient of spring  
406         vegetation phenology during the last decade on the Qinghai-Tibetan Plateau. *Agricultural  
407         and Forest Meteorology* 189-190: 71-80.
- 408     7. Gao Q, Guo Y, Xu H, Ganjurjav H, Li Y, et al. (2016) Climate change and its impacts on vegetation  
409         distribution and net primary productivity of the alpine ecosystem in the Qinghai-Tibetan  
410         Plateau. *Science of the Total Environment* 554-555: 34-41.
- 411     8. Friend AD, Lucht W, Rademacher TT, Keribin R, Betts R, et al. (2014) Carbon residence time  
412         dominates uncertainty in terrestrial vegetation responses to future climate and atmospheric  
413         CO<sub>2</sub>. *Proceedings of the National Academy of Sciences of the United States of America* 111:  
414         3280-3285.
- 415     9. Kicklighter DW, Cai Y, Zhuang Q, Parfenova EI, Paltsev S, et al. (2014) Potential influence of  
416         climate-induced vegetation shifts on future land use and associated land carbon fluxes in  
417         Northern Eurasia. *Environmental Research Letters* 9: 156-166.
- 418     10. Dieleman CM, Branfireun BA, Lindo Z (2017) Northern peatland carbon dynamics driven by plant  
419         growth form—the role of graminoids. *Plant and Soil* 415: 25-35.
- 420     11. Morales P, Hickler T, Rowell DP, Smith B, Sykes MT (2007) Changes in European ecosystem  
421         productivity and carbon balance driven by regional climate model output. *Global Change  
422         Biology* 13: 108-122.
- 423     12. Koven CD, Ringeval B, Friedlingstein P, Ciais P, Cadule P, et al. (2011) Permafrost carbon-climate  
424         feedbacks accelerate global warming. *Proceedings of the National Academy of Sciences of  
425         the United States of America* 108: 14769-14774.
- 426     13. Schaefer K, Lantuit H, Romanovsky VE, Schuur EAG, Witt R (2014) The impact of the permafrost  
427         carbon feedback on global climate. *Environmental Research Letters* 9.
- 428     14. Schädel C, Bader MKF, Schuur EAG, Biasi C, Bracho R, et al. (2016) Potential carbon emissions  
429         dominated by carbon dioxide from thawed permafrost soils. *Nature Climate Change* 6.
- 430     15. Schaphoff S, Heyder U, Ostberg S, Gerten D, Heinke J, et al. (2013) Contribution of permafrost soils  
431         to the global carbon budget. *Environmental Research Letters* 8: 3865-3879.

- 432 16. Morgan JA, Lecain DR, Mosier AR, Milchunas DG (2001) Elevated CO<sub>2</sub> enhances water relations  
433 and productivity and affects gas exchange in C<sub>3</sub> and C<sub>4</sub> grasses of the Colorado shortgrass  
434 steppe. *Global Change Biology* 7: 451–466.
- 435 17. Donohue RJ, Roderick ML, Mcvicar TR, Farquhar GD (2013) Impact of CO<sub>2</sub> fertilization on  
436 maximum foliage cover across the globe's warm, arid environments. *Geophysical Research*  
437 *Letters* 40: 3031–3035.
- 438 18. Chen H, Zhu Q, Peng C, Wu N, Wang Y, et al. (2013) The impacts of climate change and human  
439 activities on biogeochemical cycles on the Qinghai - Tibetan Plateau. *Global change biology*  
440 19: 2940-2955.
- 441 19. Liu XD, Chen BD (2000) Climatic warming in the Tibetan plateau during recent decades.  
442 *International Journal of Climatology* 20: 1729-1742.
- 443 20. Kang SC, Xu YW, You QL, Flügel WA, Pepin N, et al. (2010) Review of climate and cryospheric  
444 change in the Tibetan Plateau. *Environmental Research Letters* 5: 75-82.
- 445 21. Su F, Duan X, Chen D, Hao Z, Cuo L (2013) Evaluation of the Global Climate Models in the CMIP5  
446 over the Tibetan Plateau. *Journal of Climate* 26: 3187-3208.
- 447 22. Tan K, Ciais P, Piao S, Wu X, Tang Y, et al. (2010) Application of the ORCHIDEE global vegetation  
448 model to evaluate biomass and soil carbon stocks of Qinghai-Tibetan grasslands. *Global*  
449 *Biogeochemical Cycles* 24.
- 450 23. Lin X, Han P, Zhang W, Wang G (2017) Sensitivity of alpine grassland carbon balance to interannual  
451 variability in climate and atmospheric CO<sub>2</sub> on the Tibetan Plateau during the last century.  
452 *Global and Planetary Change* 154: 23-32.
- 453 24. Saito M, Kato T, Tang Y (2009) Temperature controls ecosystem CO<sub>2</sub> exchange of an alpine  
454 meadow on the northeastern Tibetan Plateau. *Global Change Biology* 15: 221-228.
- 455 25. Kato T, Tang Y, Gu S, Hirota M, Du M, et al. (2006) Temperature and biomass influences on  
456 interannual changes in CO<sub>2</sub> exchange in an alpine meadow on the Qinghai-Tibetan Plateau.  
457 *Global Change Biology* 12: 1285-1298.
- 458 26. Piao S, Cui M, Chen A, Wang X, Ciais P, et al. (2011) Altitude and temperature dependence of  
459 change in the spring vegetation green-up date from 1982 to 2006 in the Qinghai-Xizang  
460 Plateau. *Agricultural and Forest Meteorology* 151: 1599-1608.
- 461 27. Yu H, Luedeling E, Xu J (2010) Winter and spring warming result in delayed spring phenology on  
462 the Tibetan Plateau. *Proceedings of the National Academy of Sciences of the United States of*  
463 *America* 107: 22151-22156.
- 464 28. Zhang G, Zhang Y, Dong J, Xiao X (2013) Green-up dates in the Tibetan Plateau have continuously  
465 advanced from 1982 to 2011. *Proceedings of the National Academy of Sciences of the United*  
466 *States of America* 110: 4309-4314.
- 467 29. Gao Y, Zhou X, Wang Q, Wang C, Zhan Z, et al. (2013) Vegetation net primary productivity and its  
468 response to climate change during 2001–2008 in the Tibetan Plateau. *Science of the Total*  
469 *Environment* 444: 356-362.
- 470 30. Jin Z, Zhuang Q, He JS, Zhu X, Song W (2015) Net exchanges of methane and carbon dioxide on the  
471 Qinghai-Tibetan Plateau from 1979 to 2100. *Environmental Research Letters* 10.
- 472 31. Klein JA, Harte J, Zhao X-Q (2007) Experimental warming, not grazing, decreases rangeland quality  
473 on the Tibetan Plateau. *Ecological Applications* 17: 541-557.
- 474 32. Li N, Genxu W, Yan Y, Yongheng G, Guangsheng L (2011) Plant production, and carbon and  
475 nitrogen source pools, are strongly intensified by experimental warming in alpine ecosystems

- 476 in the Qinghai-Tibet Plateau. *Soil Biology and Biochemistry* 43: 942-953.
- 477 33. Fu G, Zhang X, Zhang Y, Shi P, Li Y, et al. (2013) Experimental warming does not enhance gross  
478 primary production and above-ground biomass in the alpine meadow of Tibet. *Journal of*  
479 *Applied Remote Sensing* 7.
- 480 34. Ganjurjav H, Gao Q, Gornish ES, Schwartz MW, Liang Y, et al. (2016) Differential response of alpine  
481 steppe and alpine meadow to climate warming in the central Qinghai-Tibetan Plateau.  
482 *Agricultural and Forest Meteorology* 223: 233-240.
- 483 35. Piao S, Fang J, Ciais P, Peylin P, Huang Y, et al. (2009) The carbon balance of terrestrial ecosystems  
484 in China. *Nature* 458: 1009-1013.
- 485 36. Zhu J, Zhang Y, Jiang L (2017) Experimental warming drives a seasonal shift of ecosystem carbon  
486 exchange in Tibetan alpine meadow. *Agricultural and Forest Meteorology*: 242–249.
- 487 37. Taylor KE, Stouffer RJ, Meehl GA (2012) An overview of CMIP5 and the experiment design. *Bulletin*  
488 *of the American Meteorological Society* 93: 485-498.
- 489 38. Moss RH, Edmonds JA, Hibbard KA, Manning MR, Rose SK, et al. (2010) The next generation of  
490 scenarios for climate change research and assessment. *Nature* 463: 747-756.
- 491 39. Parton WJ, Schimel DS, Cole C, Ojima D (1987) Analysis of factors controlling soil organic matter  
492 levels in Great Plains grasslands. *Soil Science Society of America Journal* 51: 1173-1179.
- 493 40. Hall D, Ojima D, Parton W, Scurlock J (1995) Response of temperate and tropical grasslands to CO<sub>2</sub>  
494 and climate change. *Journal of Biogeography*: 537-547.
- 495 41. Parton W, Scurlock J, Ojima D, Gilmanov T, Scholes R, et al. (1993) Observations and modeling of  
496 biomass and soil organic matter dynamics for the grassland biome worldwide. *Global*  
497 *biogeochemical cycles* 7: 785-809.
- 498 42. Parton W, Scurlock J, Ojima D, Schimel D, Hall D (1995) Impact of climate change on grassland  
499 production and soil carbon worldwide. *Global Change Biology* 1: 13-22.
- 500 43. Chimner RA, Cooper DJ, Parton WJ (2002) Modeling carbon accumulation in Rocky Mountain fens.  
501 *Wetlands* 22: 100-110.
- 502 44. McGuire A, Melillo J, Randerson J, Parton W, Heimann M, et al. (2000) Modeling the effects of  
503 snowpack on heterotrophic respiration across northern temperate and high latitude regions:  
504 Comparison with measurements of atmospheric carbon dioxide in high latitudes.  
505 *Biogeochemistry* 48: 91-114.
- 506 45. Zhu X, Yu G, Wang Q, Gao Y, Zhao X, et al. (2013) The interaction between components of  
507 ecosystem respiration in typical forest and grassland ecosystems. *Acta Ecologica Sinica* 33:  
508 6925-6934.
- 509 46. Zhang Y, Wei Q, Zhou C, Ding M, Liu L, et al. (2014) Spatial and temporal variability in the net  
510 primary production of alpine grassland on the Tibetan Plateau since 1982. *Journal of*  
511 *Geographical Sciences* 24: 269-287.
- 512 47. Pan S, Dangal SR, Tao B, Yang J, Tian H (2015) Recent patterns of terrestrial net primary  
513 production in Africa influenced by multiple environmental changes. *Ecosystem Health and*  
514 *Sustainability* 1: 1-15.
- 515 48. Tian H, Melillo JM, Kicklighter DW, McGuire AD, Helfrich JV, et al. (1998) Effect of interannual  
516 climate variability on carbon storage in Amazonian ecosystems. *Nature* 396: 664-667.
- 517 49. Mitchell TD, Jones PD (2005) An improved method of constructing a database of monthly climate  
518 observations and associated high - resolution grids. *International journal of climatology* 25:  
519 693-712.

- 520 50. Harris I, Jones P, Osborn T, Lister D (2014) Updated high - resolution grids of monthly climatic  
521 observations—the CRU TS3. 10 Dataset. *International Journal of Climatology* 34: 623-642.
- 522 51. Jones C, Giorgi F, Asrar G (2011) The Coordinated Regional Downscaling Experiment: CORDEX, an  
523 international downscaling link to CMIP5. *CLIVAR exchanges* 56: 34-40.
- 524 52. Kang X, Hao Y, Li C, Cui X, Wang J, et al. (2011) Modeling impacts of climate change on carbon  
525 dynamics in a steppe ecosystem in Inner Mongolia, China. *Journal of Soils and Sediments* 11:  
526 562-576.
- 527 53. Behrman KD, Kiniry JR, Winchell M, Juenger TE, Keitt TH (2013) Spatial forecasting of switchgrass  
528 productivity under current and future climate change scenarios. *Ecological Applications* 23:  
529 73-85.
- 530 54. Lenihan JM, Bachelet D, Neilson RP, Drapek R (2008) Response of vegetation distribution,  
531 ecosystem productivity, and fire to climate change scenarios for California. *Climatic Change*  
532 87: 215-230.
- 533 55. Cook BI, Smerdon JE, Seager R, Coats S (2014) Global warming and 21 st century drying. *Climate*  
534 *Dynamics* 43: 2607-2627.
- 535 56. Trenberth KE, Dai A, Schrier GVD, Jones PD, Barichivich J, et al. (2013) Global warming and  
536 changes in drought. *Nature Climate Change* 4: 17-22.
- 537 57. Liu Y, Wang T, Huang M, Yao Y, Ciais P, et al. (2016) Changes in interannual climate sensitivities of  
538 terrestrial carbon fluxes during the 21st century predicted by CMIP5 Earth system models.  
539 *Journal of Geophysical Research Biogeosciences* 121.
- 540 58. de Vries FT, Brown C, Stevens CJ (2016) Grassland species root response to drought:  
541 consequences for soil carbon and nitrogen availability. *Plant and Soil* 409: 297-312.
- 542 59. Shen ZX, Li YL, Fu G (2015) Response of soil respiration to short-term experimental warming and  
543 precipitation pulses over the growing season in an alpine meadow on the Northern Tibet.  
544 *Applied Soil Ecology* 90: 35-40.
- 545 60. Dorrepaal E, Toet S, Logtestijn RSPV, Swart E, Weg MJVD, et al. (2009) Carbon respiration from  
546 subsurface peat accelerated by climate warming in the subarctic. *Nature* 460: 616-619.
- 547 61. Curiel YJ, Baldocchi DD, Gershenson A, Goldstein A, Misson L, et al. (2007) Microbial soil  
548 respiration and its dependency on carbon inputs, soil temperature and moisture. *Global*  
549 *Change Biology* 13: 2018–2035.
- 550 62. Cao M, Woodward FI (1998) Dynamic responses of terrestrial ecosystem carbon cycling to global  
551 climate change. *Nature* 393: 249-252.
- 552 63. Stocker TF, Qin D, Plattner G, Tignor M, Allen S, et al. (2013) *Climate change 2013: the physical*  
553 *science basis. Intergovernmental panel on climate change, working group I Contribution to*  
554 *the IPCC fifth assessment report (AR5). New York.*
- 555 64. Crowther T, Todd-Brown K, Rowe C, Wieder W, Carey J, et al. (2016) Quantifying global soil carbon  
556 losses in response to warming. *Nature* 540: 104-108.
- 557 65. Zeng N, Zhao F, Collatz GJ, Kalnay E, Salawitch RJ, et al. (2014) Agricultural Green Revolution as a  
558 driver of increasing atmospheric CO<sub>2</sub> seasonal amplitude. *Nature* 515: 394-397.
- 559 66. Reich PB, Hobbie SE (2013) Decade-long soil nitrogen constraint on the CO<sub>2</sub> fertilization of plant  
560 biomass. *Nature Climate Change* 3: 278-282.
- 561 67. Wan S, Norby RJ, Ledford J, Weltzin JF (2007) Responses of soil respiration to elevated CO<sub>2</sub> , air  
562 warming, and changing soil water availability in a model old-field grassland. *Global Change*  
563 *Biology* 13: 2411-2424.

- 564 68. Giorgi F, Jones C, Asrar GR (2009) Addressing climate information needs at the regional level: the  
565 CORDEX framework. *Bulletin - World Meteorological Organization*: 175-183.
- 566 69. Foley AM (2010) Uncertainty in regional climate modelling: A review. *Progress in Physical*  
567 *Geography* 34: 647-670.
- 568 70. Giorgi F, Gutowski WJ (2015) Regional Dynamical Downscaling and the CORDEX Initiative. *Annual*  
569 *Review of Environment and Resources* 40: 1-24.
- 570 71. Wårlind D, Smith B, Hickler T, Arneth A (2014) Nitrogen feedbacks increase future terrestrial  
571 ecosystem carbon uptake in an individual-based dynamic vegetation model. *Biogeosciences*  
572 *Discussions* 11: 6131-6146.
- 573 72. Sokolov AP, Kicklighter DW, Melillo JM, Felzer BS, Schlosser CA, et al. (2008) Consequences of  
574 Considering Carbon–Nitrogen Interactions on the Feedbacks between Climate and the  
575 Terrestrial Carbon Cycle. *Journal of Climate* 21: 3776-3796.
- 576 73. Wieder WR, Cleveland CC, Smith WK, Todd-Brown K (2015) Future productivity and carbon  
577 storage limited by terrestrial nutrient availability. *Nature Geoscience* 8: 441-444.
- 578 74. Piao S, Sitch S, Ciais P, Friedlingstein P, Peylin P, et al. (2013) Evaluation of terrestrial carbon cycle  
579 models for their response to climate variability and to CO<sub>2</sub> trends. *Global Change Biology* 19:  
580 2117–2132.
- 581
- 582
- 583
- 584
- 585
- 586

## 587 **Figures captions**

588 Fig. 1 Comparisons of observed and modeled aboveground biomass (AGC, a), and net primary  
589 production (NPP, b), heterotrophic respiration (Rh, c), and net ecosystem production (NEE, d) at  
590 the Haibei research station of the Tibetan Plateau.

591 Fig. 2 Temporal dynamics of simulated NPP (a), Rh (b), and NEP (c) in the Tibetan Plateau  
592 grassland from 2006 to 2100. Solid lines are the three climate models means under different RCP  
593 scenarios, and the shading area denotes one standard deviation.

594 Fig. 3 Spatial distributions of the partial correlation coefficients (R) between precipitation and  
595 simulated NPP (a, b, c), Rh (d, e, f), and NEP (g, h, i) in the Tibetan Plateau grassland from 2006  
596 to 2100 under the three RCP scenarios. Black point signs showed significance level at  $P < 0.05$ .



597 Fig. 4 Spatial distributions of the partial correlation coefficients (R) between Tmean and simulated  
598 NPP (a, b, c), Rh (d, e, f), and NEP (g, h, i) in the Tibetan Plateau grassland from 2006 to 2100  
599 under the three RCP scenarios. Black point signs showed significance level at  $P < 0.05$ .

600 Fig. 5 Responses of simulated  $\Delta$ NPP (a, d, g),  $\Delta$ Rh (b, e, h), and  $\Delta$ NEP (c, f, i) in the Tibetan  
601 Plateau grassland to climate change over the 2010s ~ 2030s, 2040s ~ 2060s and 2070s ~ 2090s  
602 time periods under the three RCP scenarios.

603 Fig. 6 The differences between simulated NPP (a), Rh (b), and NEP (c) with and without CO<sub>2</sub>  
604 effects in the Tibetan Plateau grassland under the three RCP scenarios.

605

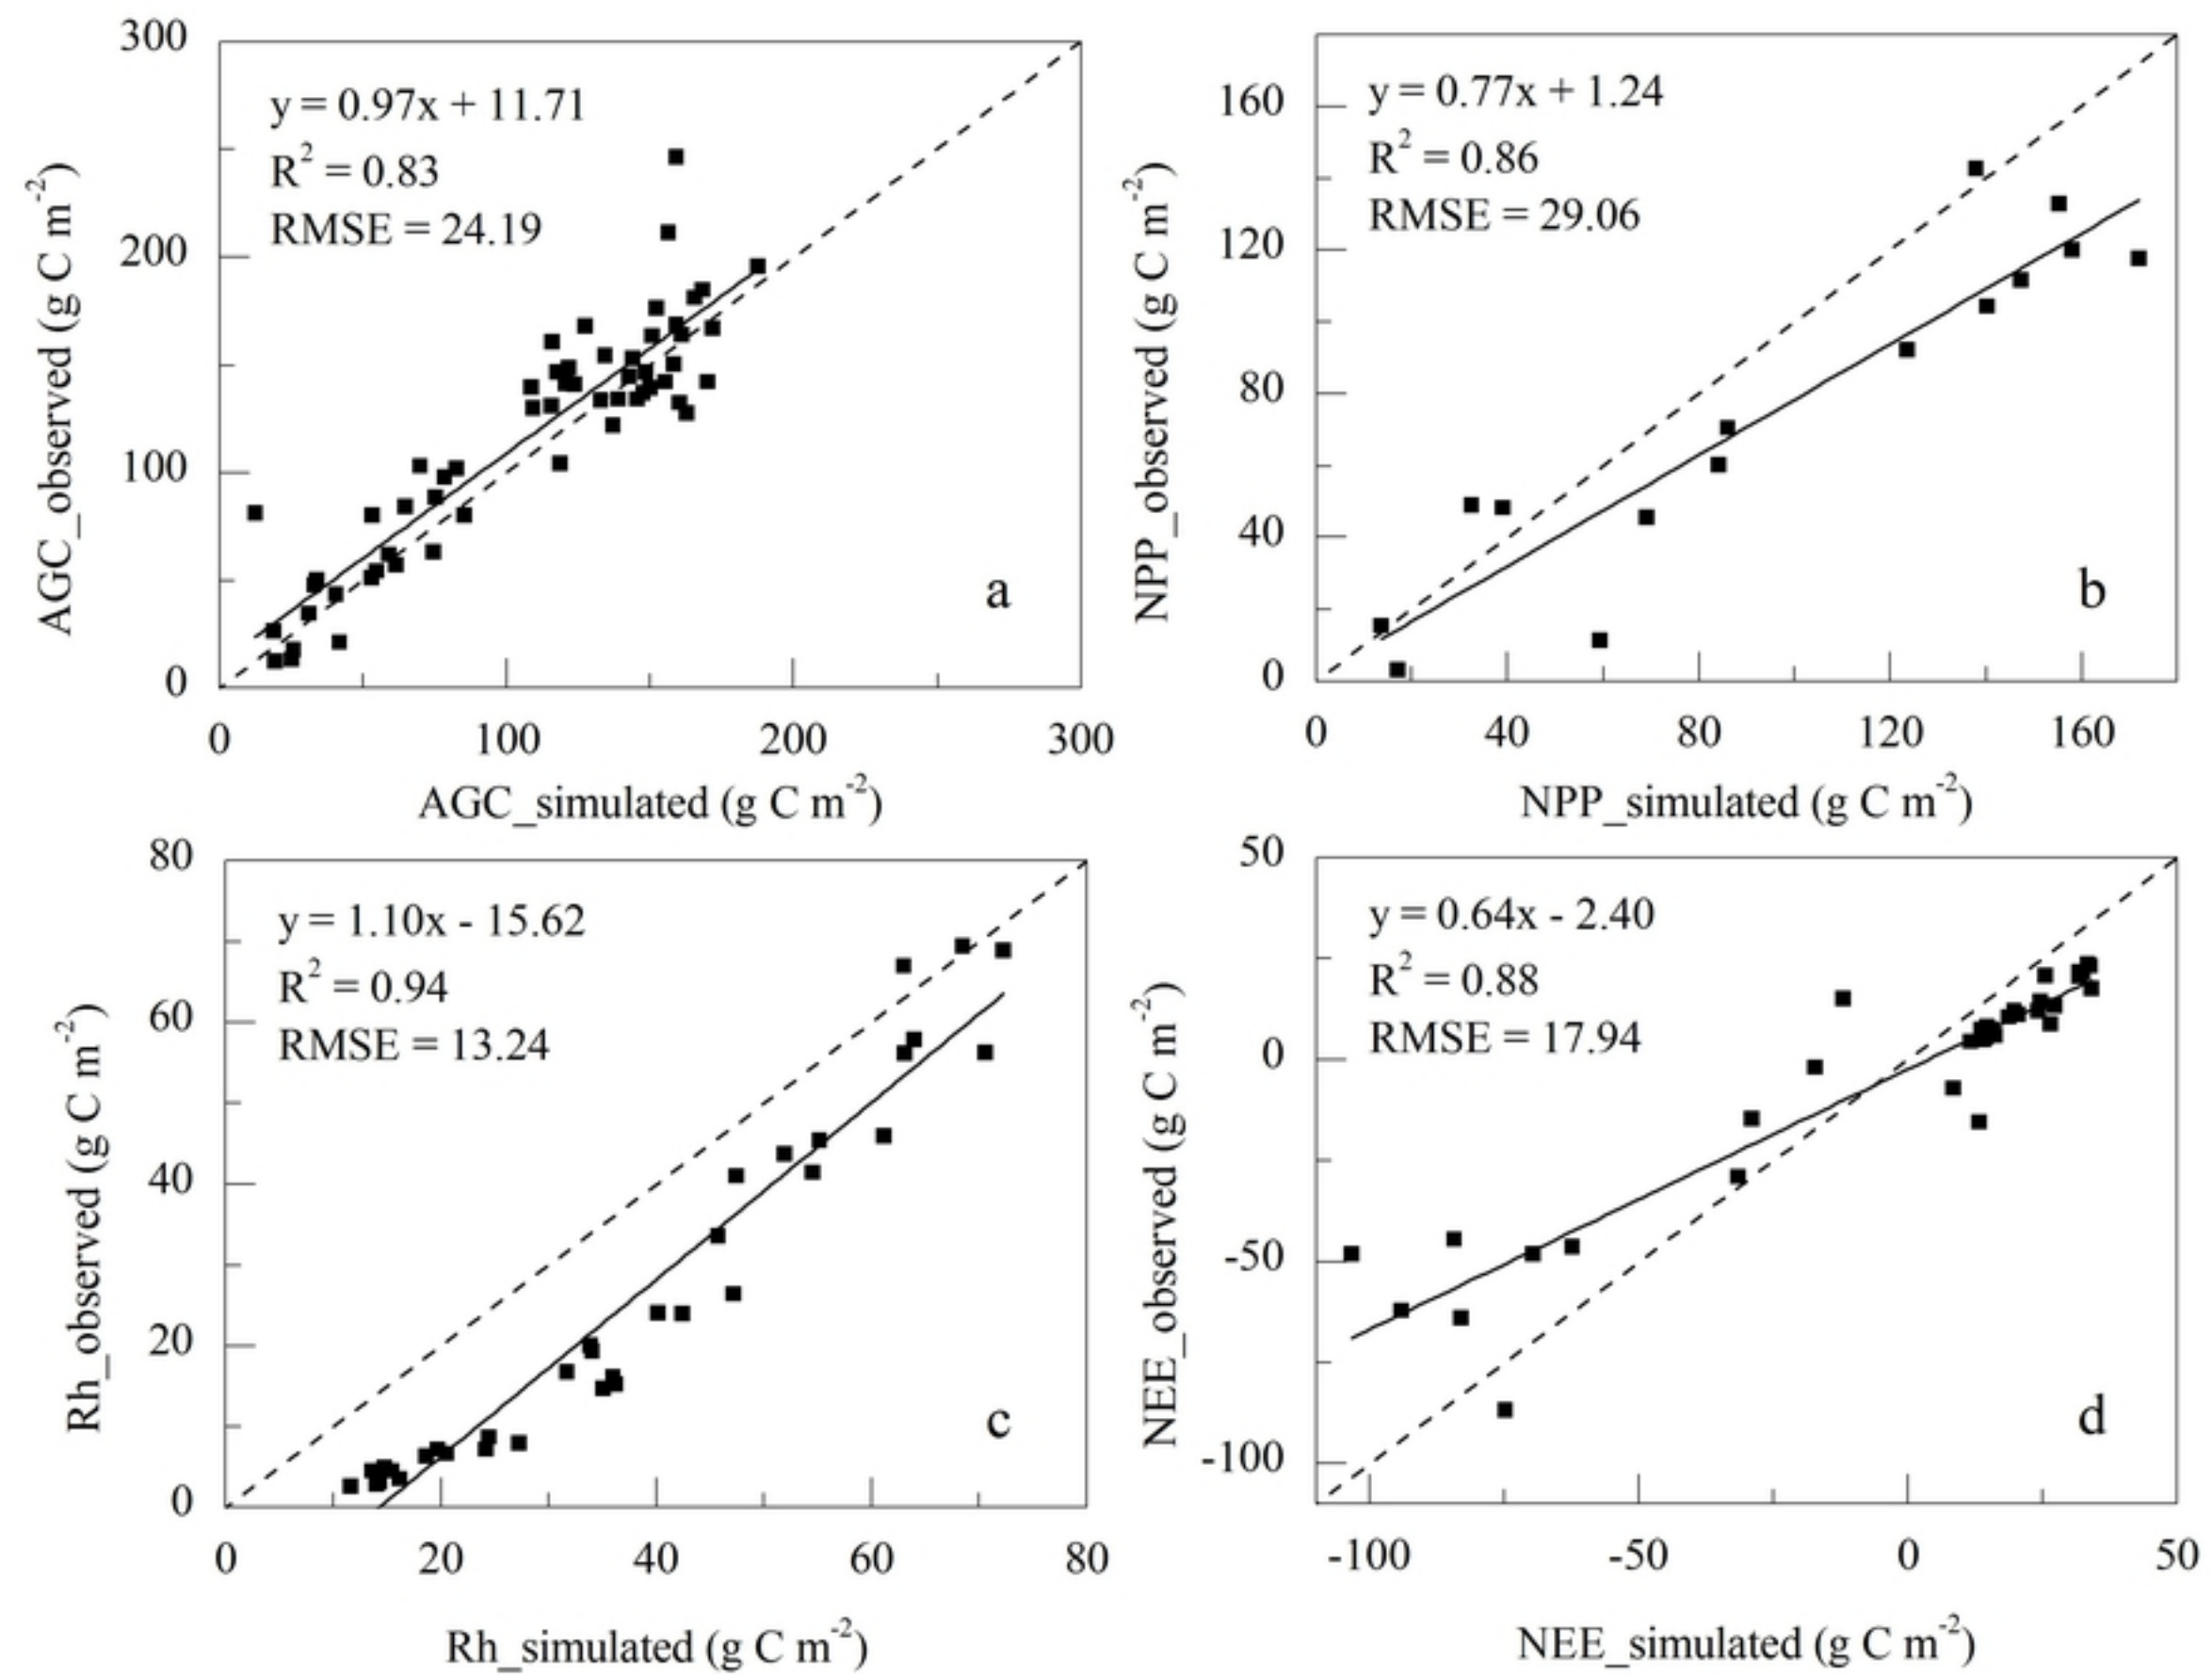

Figure 1

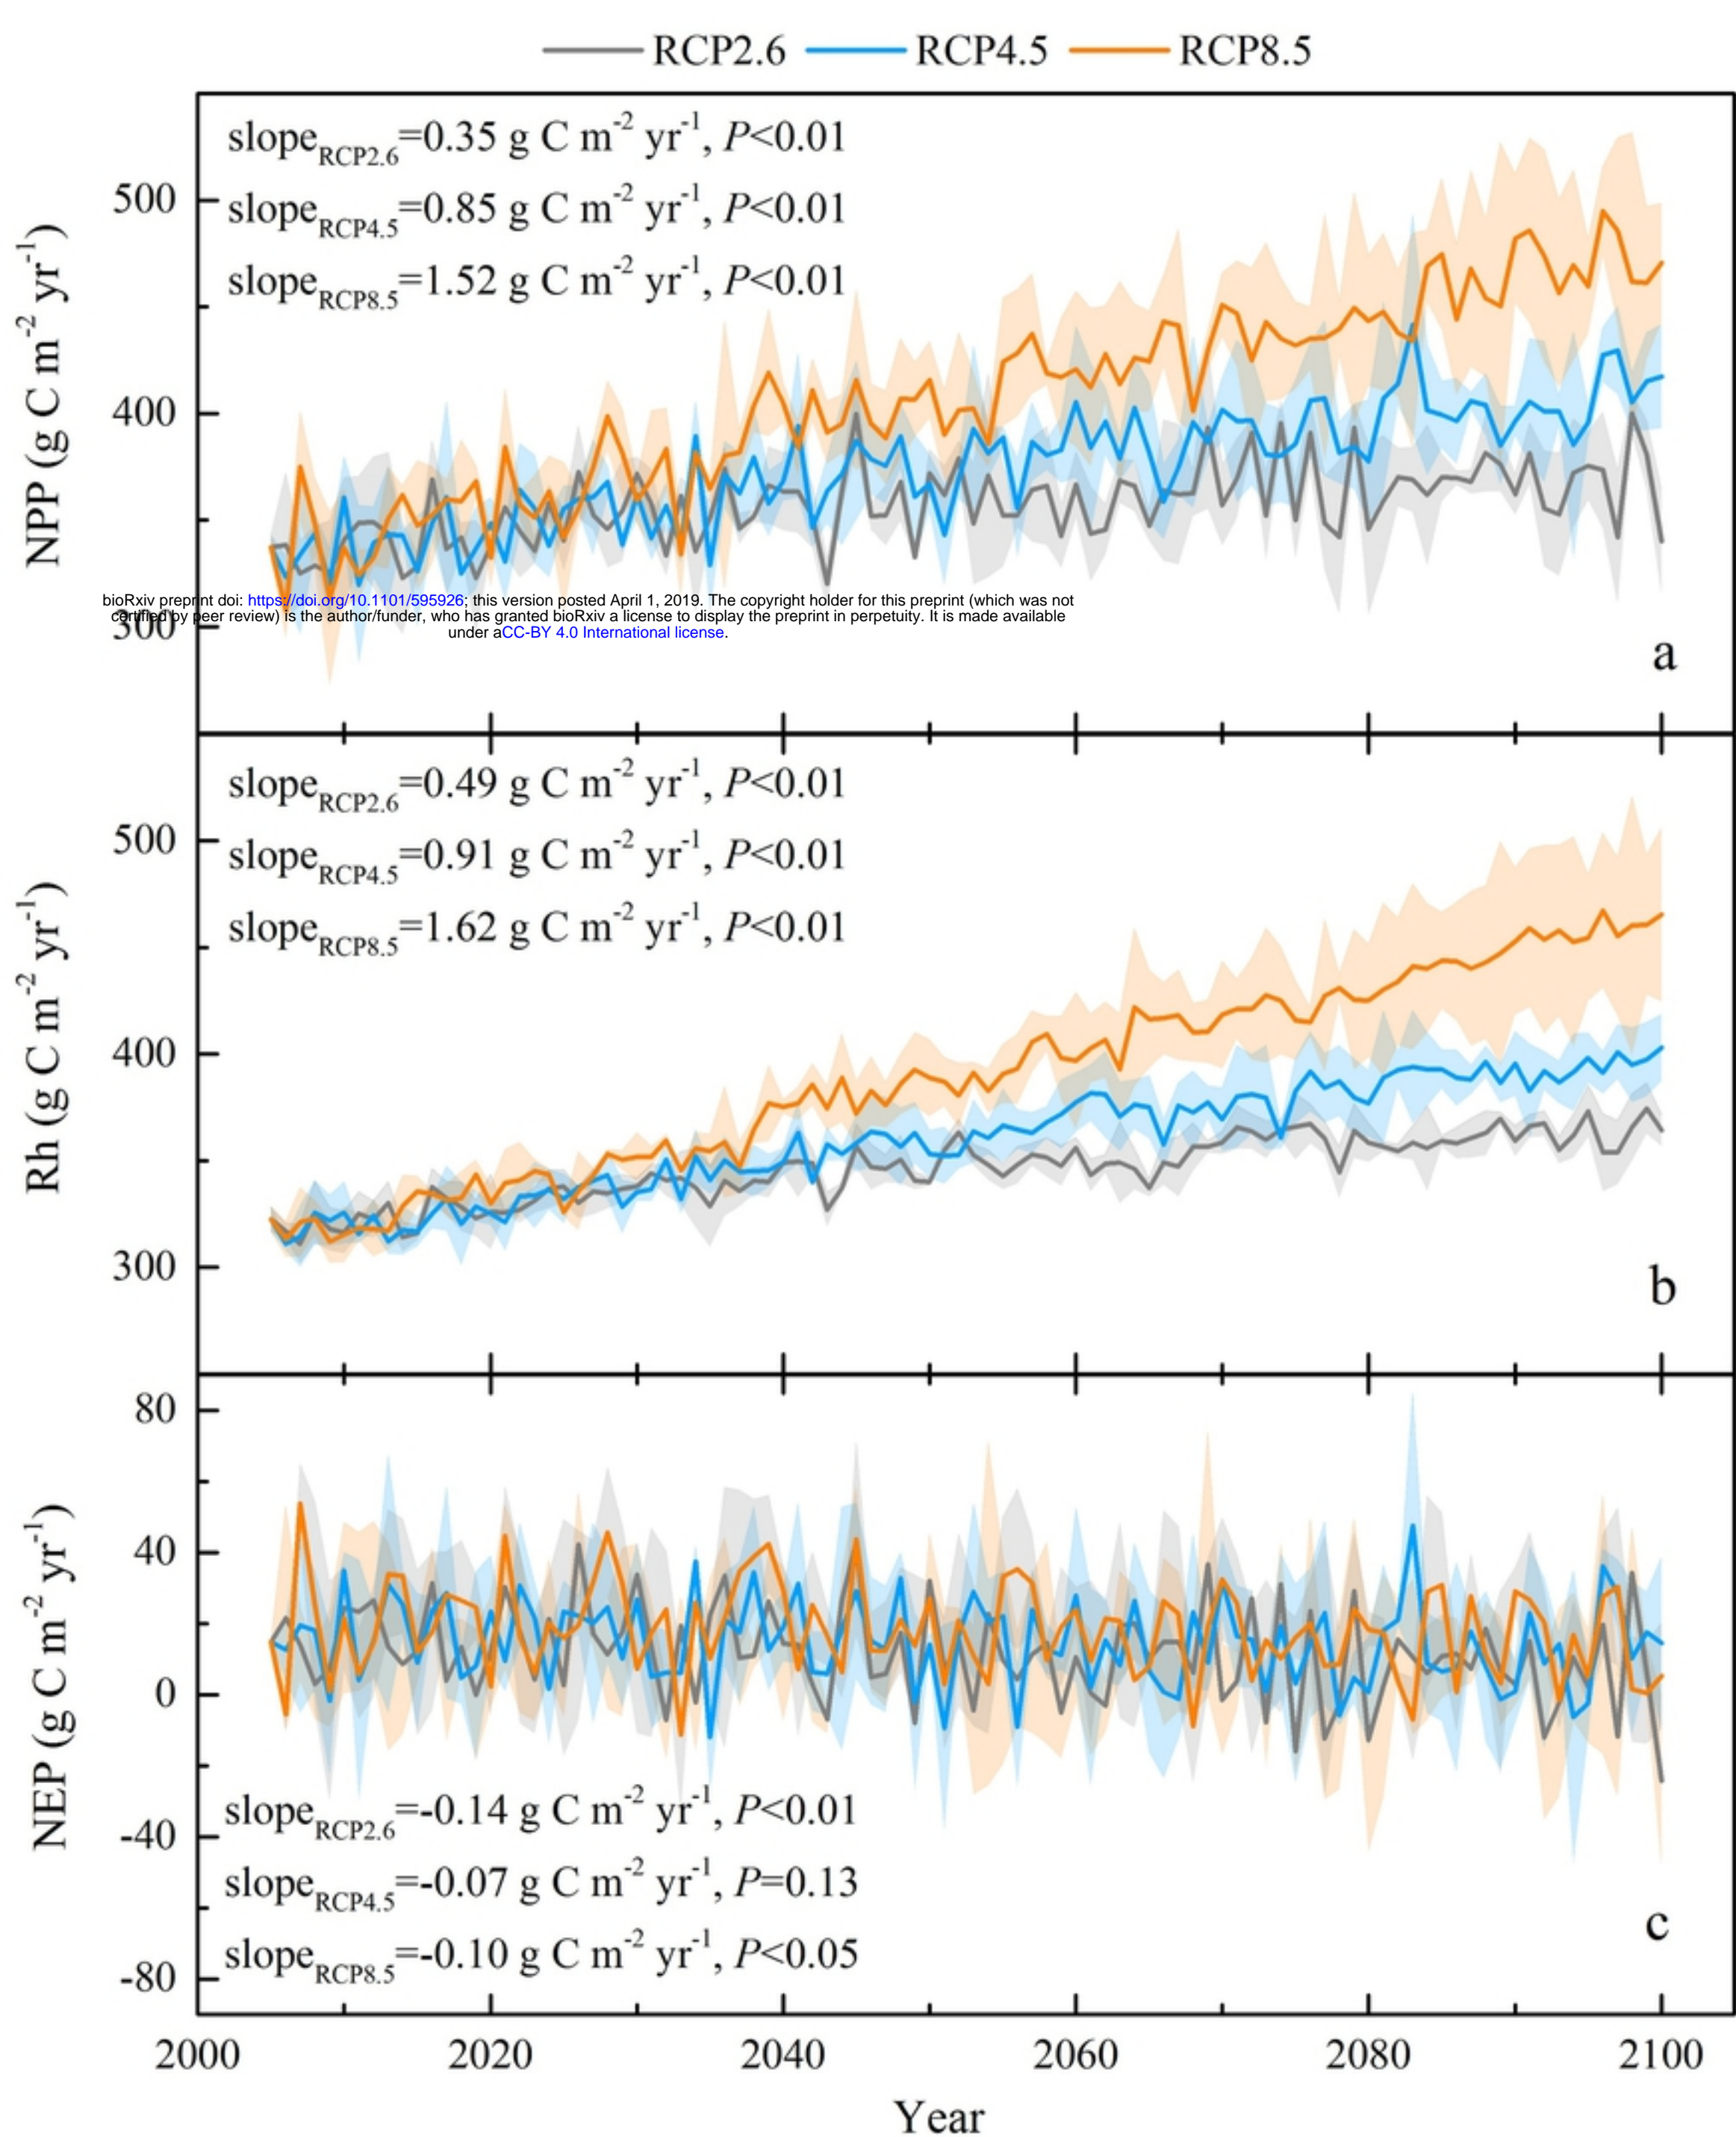

Figure2

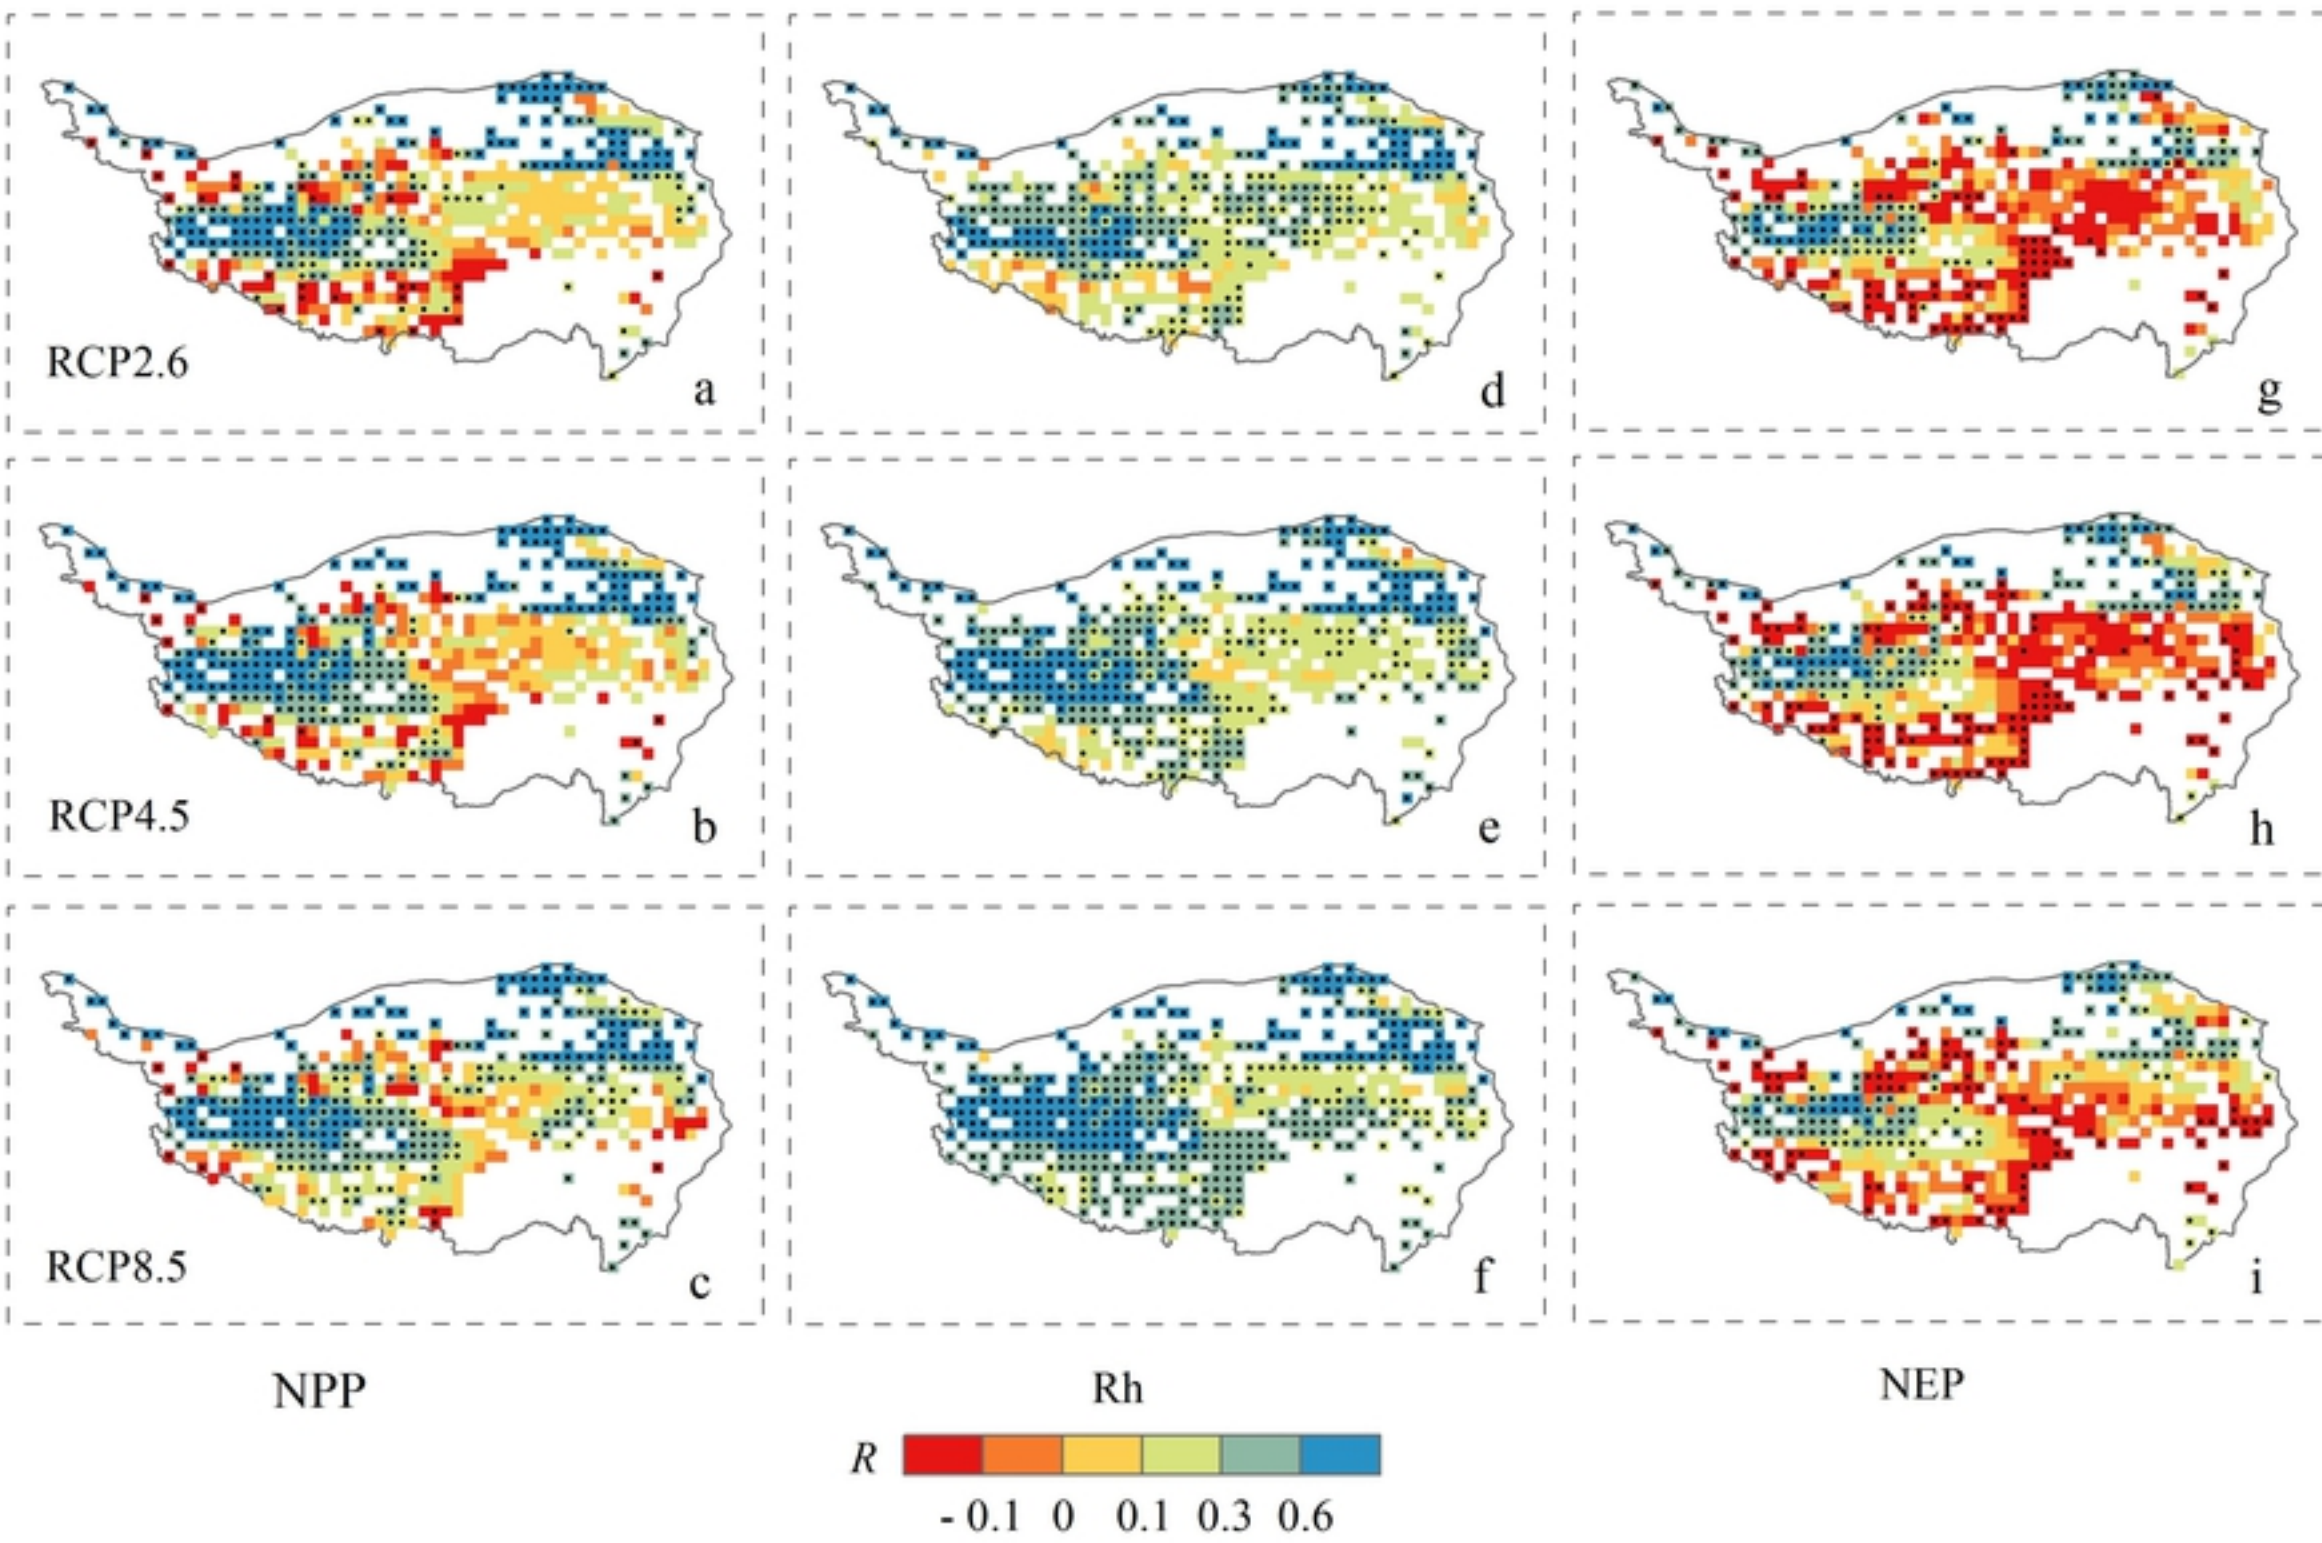

Figure3

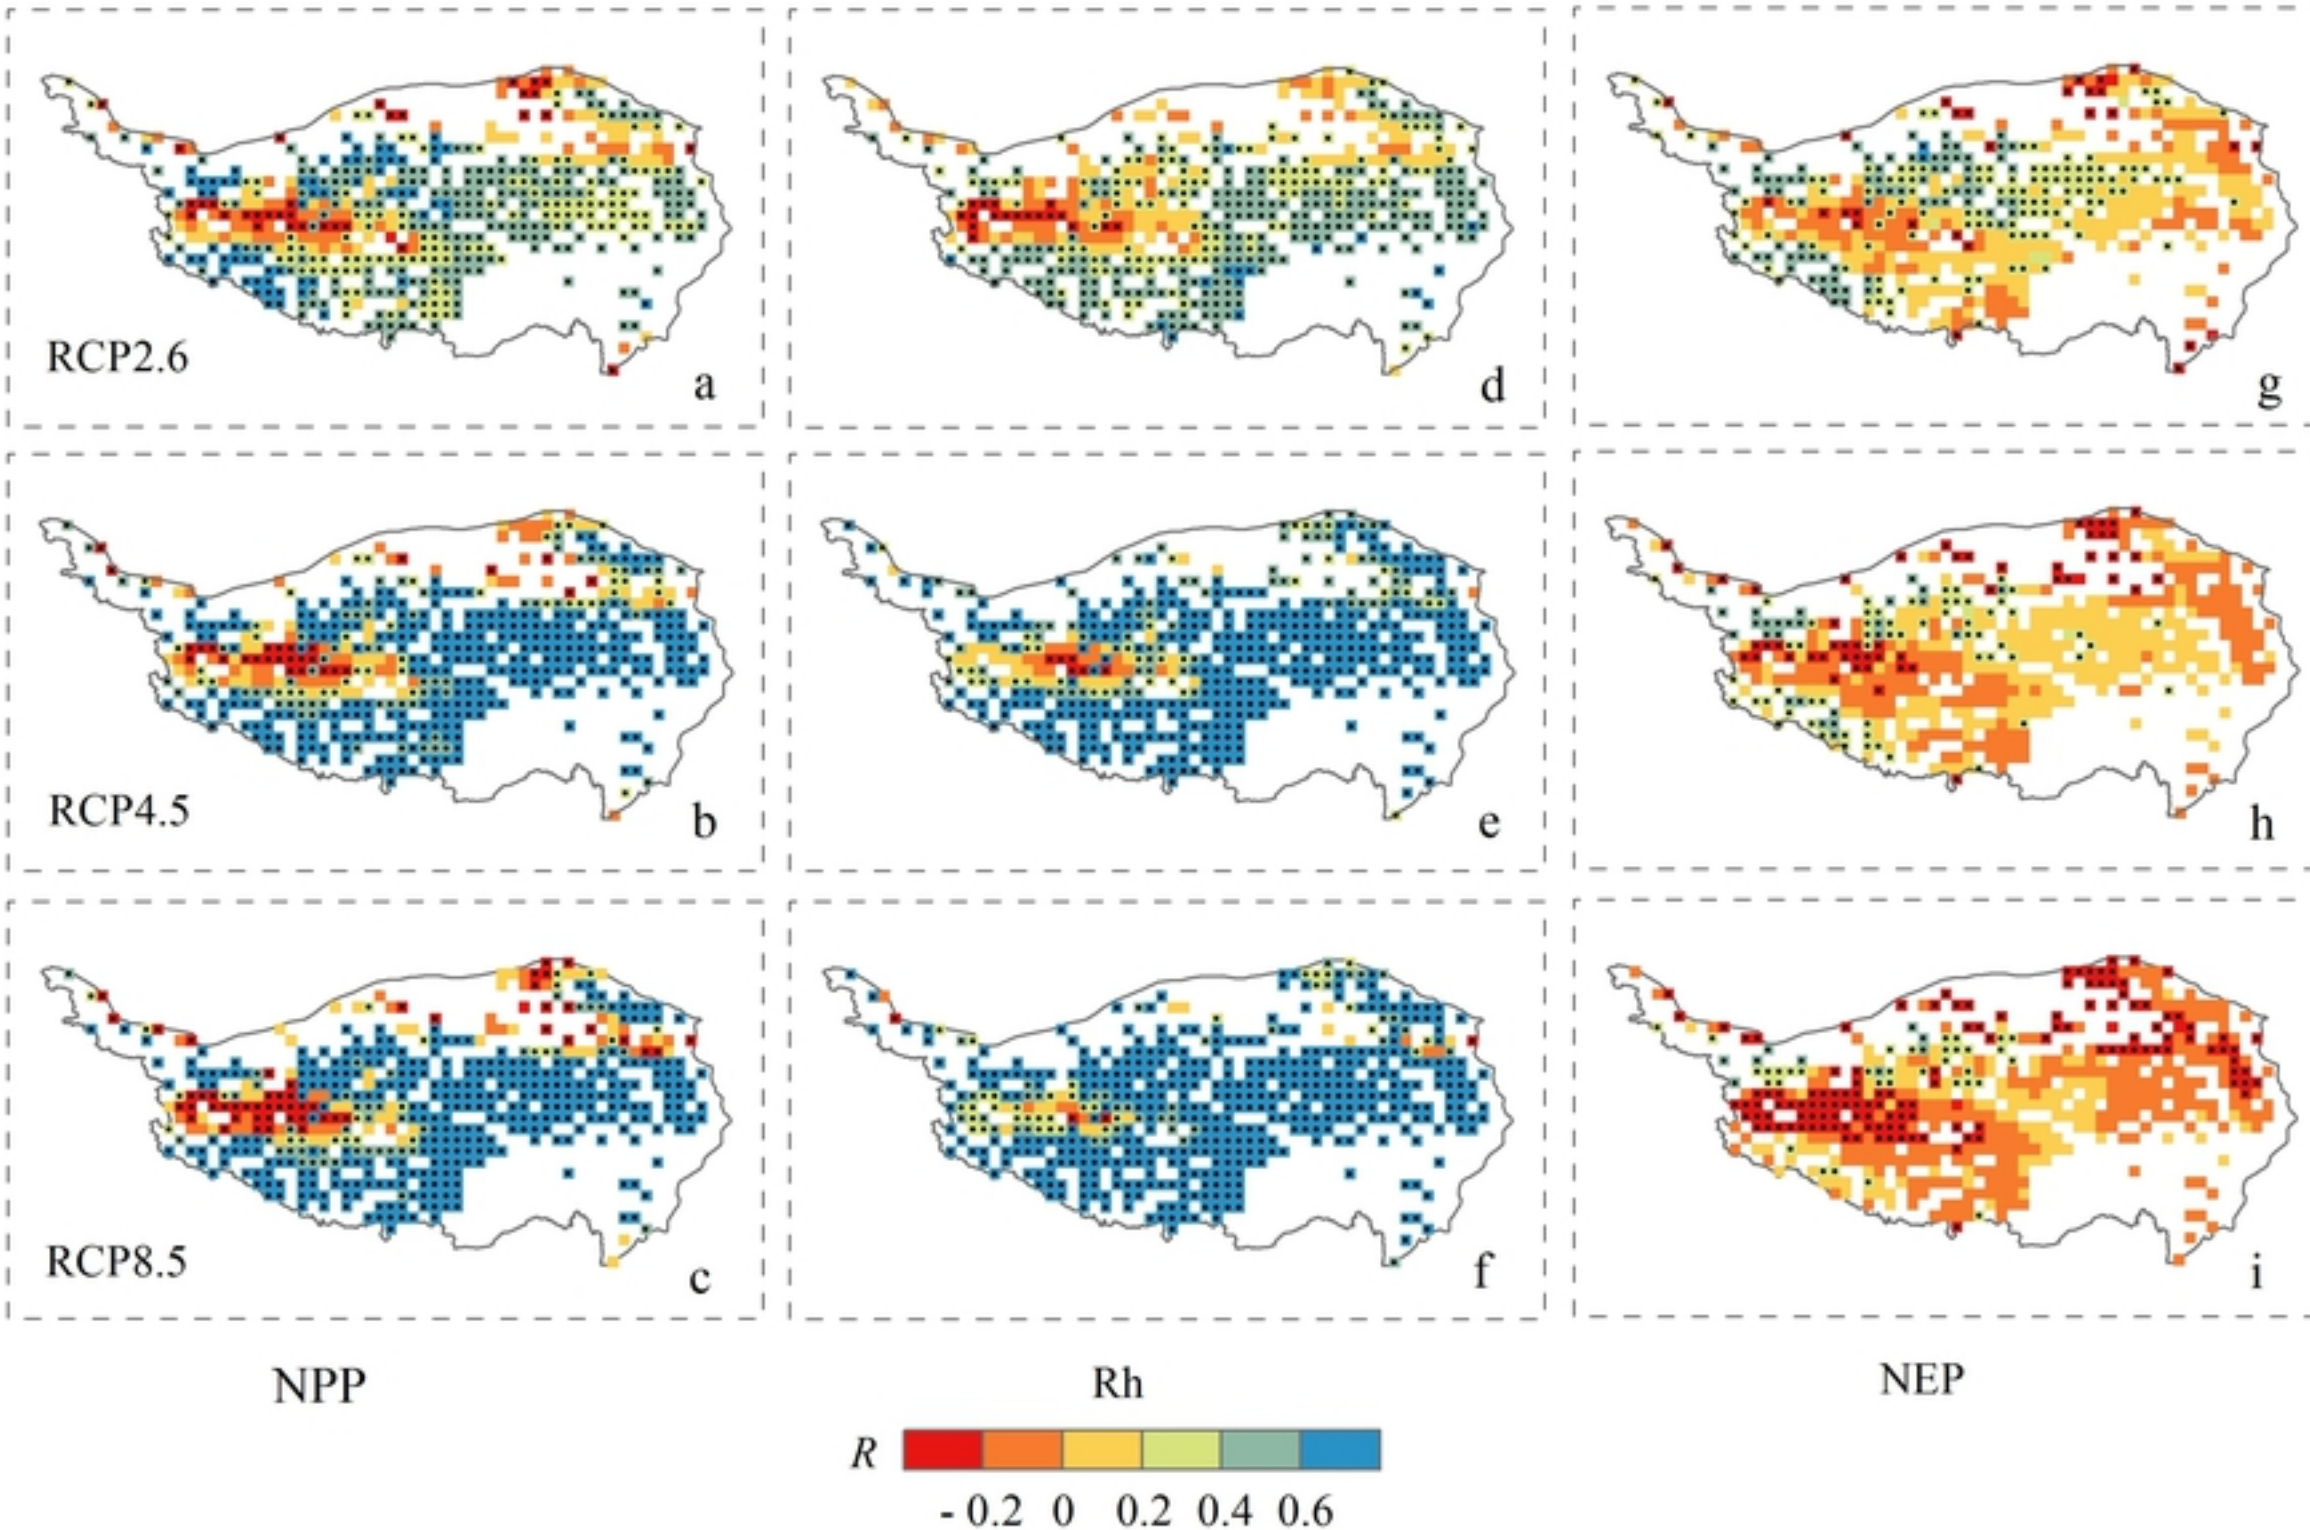

Figure4

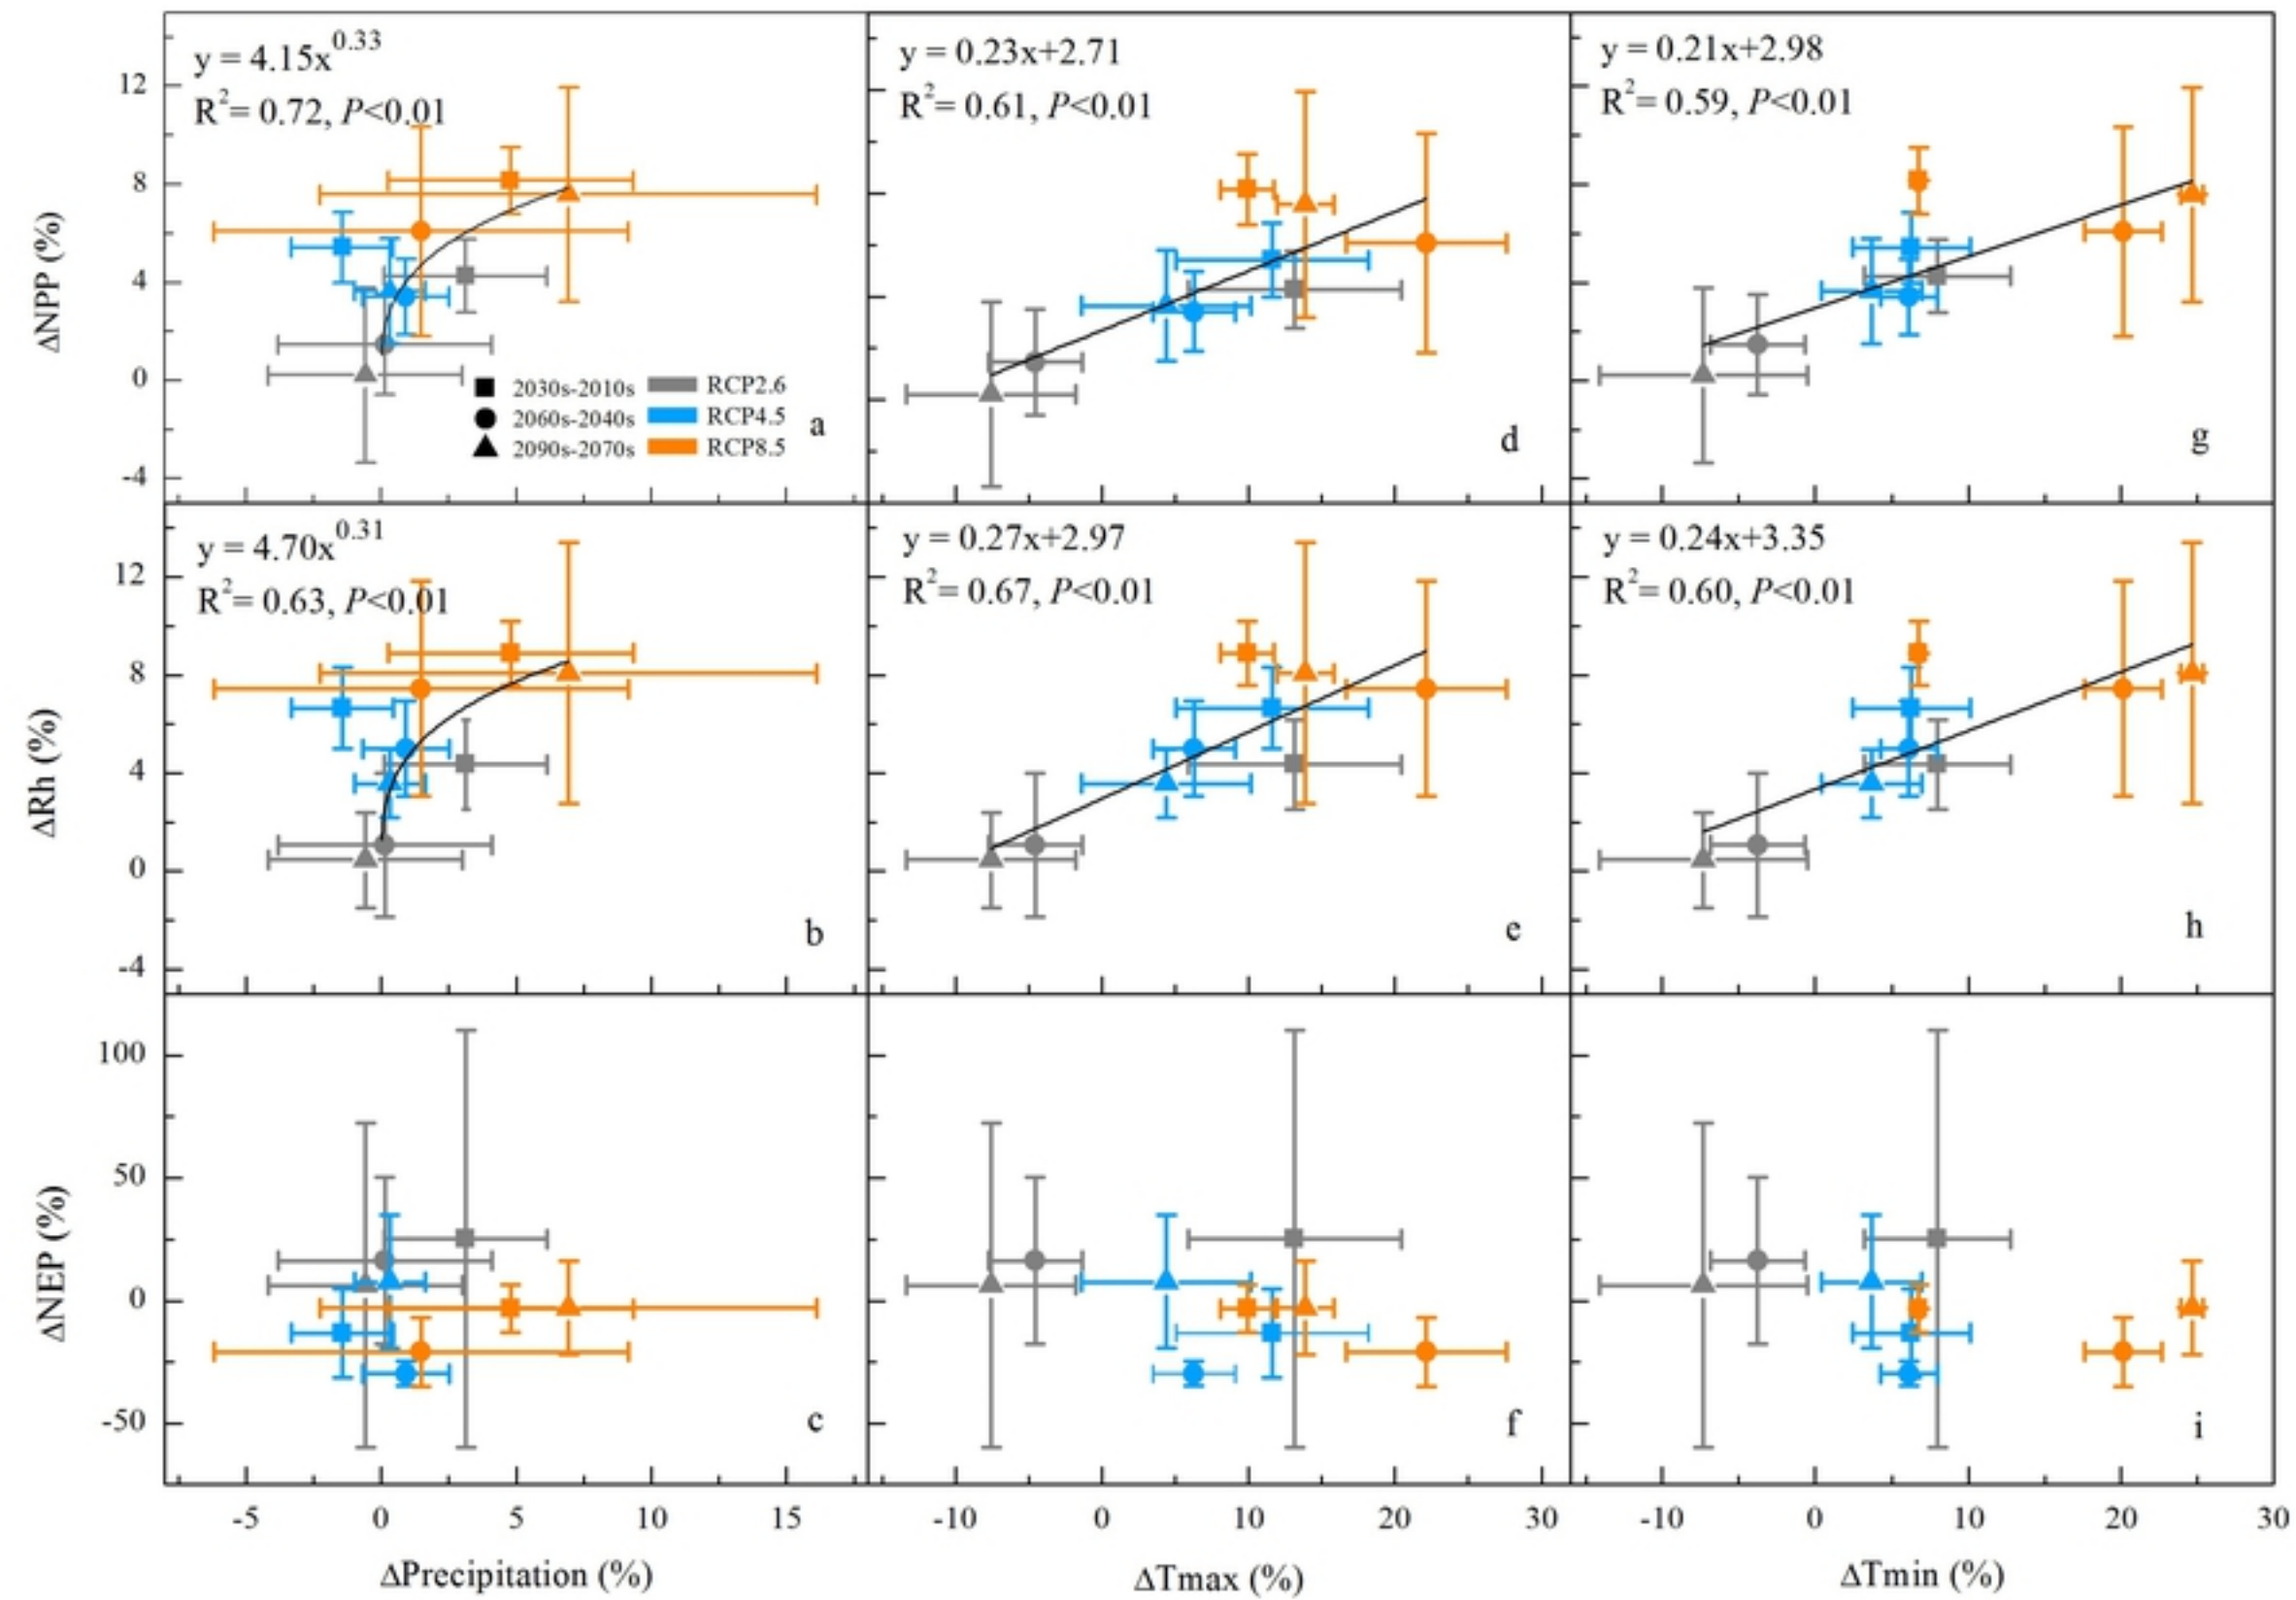

Figure5

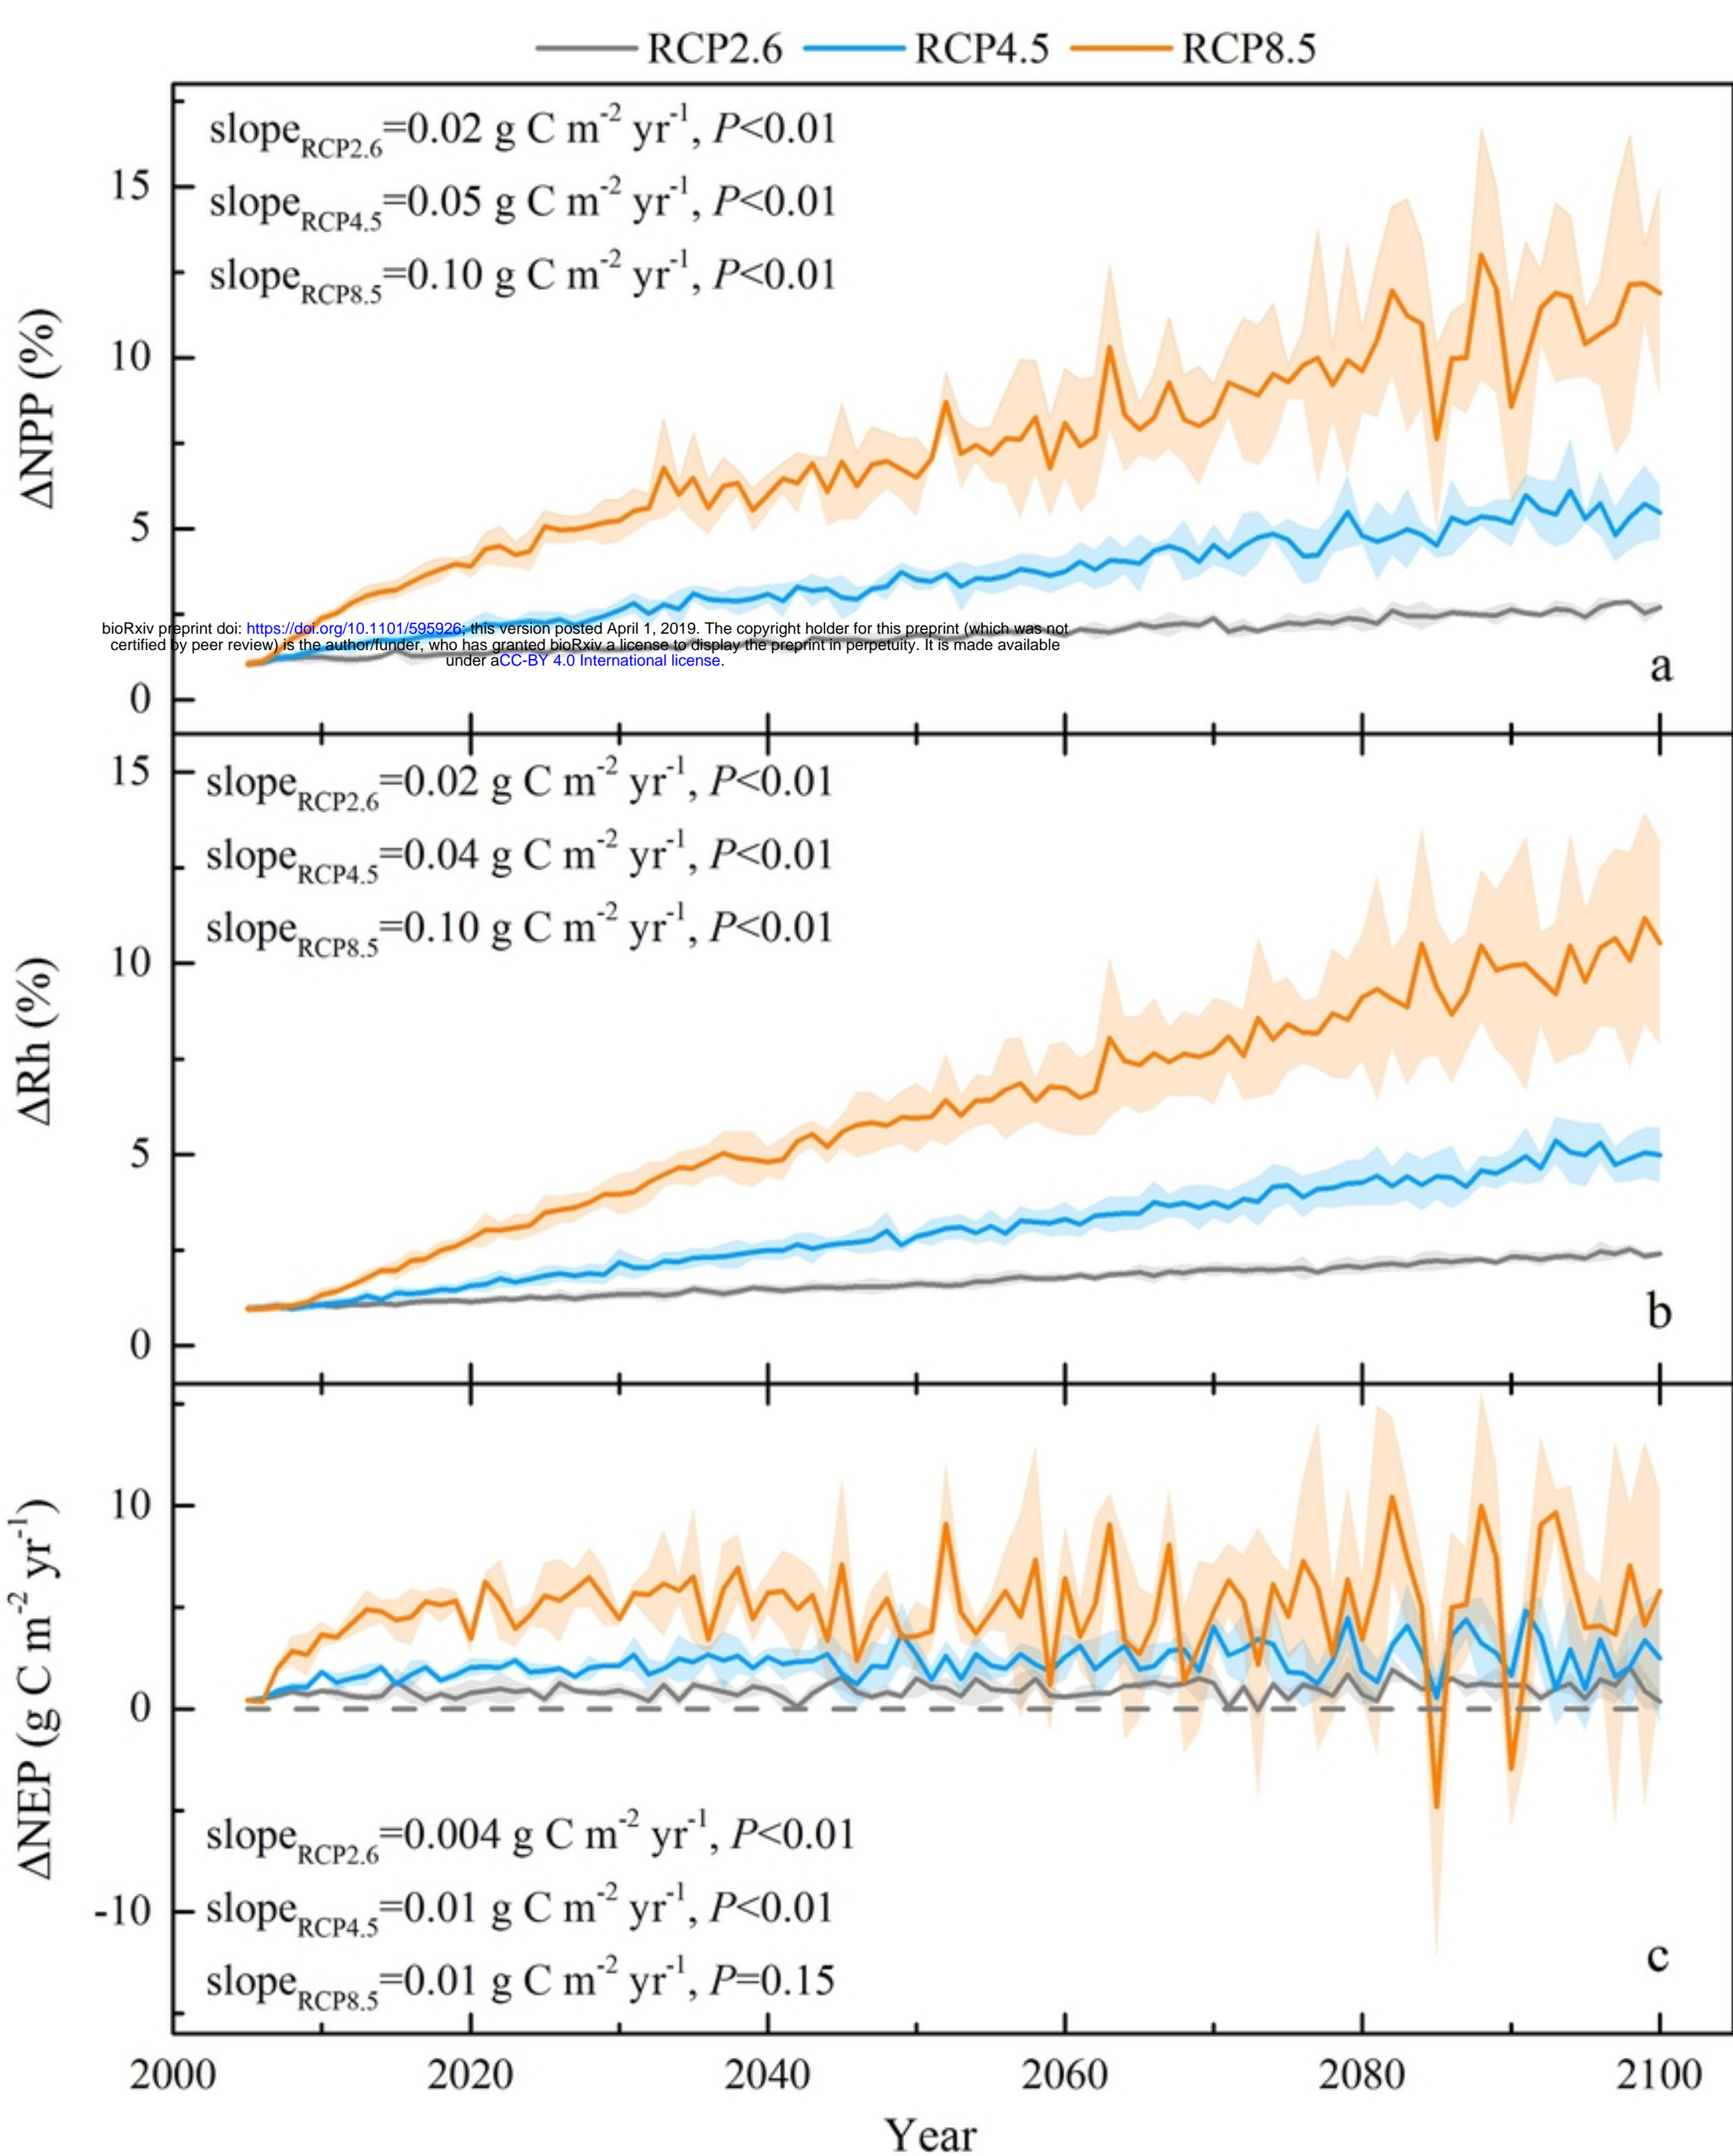

Figure6
